# Supplementary material
Source: MDPI journal article supplement (https://www.mdpi.com/1999-4907/11/1/7)
Supplement: s1 [file s1]

Table S2: Common pathogens causing cankers on pines in European forest stands

| Pathogen name                                                                 | Country of detection                                                            | Host species                                                                                                                                                                                     | References                                     |
|-------------------------------------------------------------------------------|---------------------------------------------------------------------------------|--------------------------------------------------------------------------------------------------------------------------------------------------------------------------------------------------|------------------------------------------------|
| <b><i>Allantophomopsiella pseudotsugae</i> (M. Wilson) Crous</b>              | Russia                                                                          | <i>P. sibirica</i> , <i>P. strobus</i> , <i>P. pumila</i>                                                                                                                                        | 1                                              |
| <b><i>Ascocalyx abietina</i> (Lagerb.) Schläpf.-Bernh.</b>                    | Poland                                                                          | <i>P. sylvestris</i>                                                                                                                                                                             | 2                                              |
| <b><i>Botryosphaeria</i> Ces. &amp; De Not.</b>                               | Slovakia                                                                        | <i>P. sylvestris</i>                                                                                                                                                                             | 3                                              |
| <b><i>Botryosphaeria iberica</i> A.J.L. Phillips, J. Luque &amp; A. Alves</b> | Italy                                                                           | <i>P. nigra</i>                                                                                                                                                                                  | 4                                              |
| <b><i>Botryosphaeria ribis</i> Grossenb. &amp; Duggar.</b>                    | Russia                                                                          | <i>P. nigra</i> , <i>P. pumila</i>                                                                                                                                                               | 5                                              |
| <b><i>Caliciopsis pinea</i> Peck</b>                                          | Italy, France                                                                   | <i>P. radiata</i> , <i>P. halepensis</i> <i>P. pinaster</i> <i>P. pinea</i> , <i>P. nigra</i> var. <i>austriaca</i>                                                                              | 6, 7, 8, 9, 10                                 |
| <b><i>Cenangium abietis</i> (Pers.) Duby</b>                                  | Russia                                                                          | <i>Pinus</i> spp.                                                                                                                                                                                | 5                                              |
| <b><i>Cenangium ferruginosum</i> Fr.</b>                                      | Bulgaria, France, Germany, Italy, Macedonia, Portugal, Slovakia, Spain, Ukraine | <i>Pinus</i> spp., <i>P. nigra</i> , <i>P. halepensis</i> , <i>P. radiata</i> , <i>P. sylvestris</i> <i>P. mugo</i> , <i>P. strobus</i> , <i>P. peuce</i> , <i>P. pinaster</i> , <i>P. pinea</i> | 11, 12, 13, 14, 15, 16, 17, 18, 19, 20, 21, 22 |
| <b><i>Cronartium ribicola</i> J.C. Fisch.</b>                                 | Germany, Lithuania, Romania, Slovakia, United Kingdom                           | <i>P. cembra</i> , <i>P. monticola</i> , <i>P. peuce</i> , <i>P. strobus</i> , <i>P. flexilis</i> , <i>P. lambertiana</i>                                                                        | 3, 23, 24, 25, 26, 27                          |

Table S2: Common pathogens causing cankers on pines in European forest stands

| Pathogen name                                                         | Country of detection                                                                  | Host species                                                                                                             | References                                      |
|-----------------------------------------------------------------------|---------------------------------------------------------------------------------------|--------------------------------------------------------------------------------------------------------------------------|-------------------------------------------------|
| <b><i>Crumenulopsis sororia</i> (P. Karst.) J.W. Groves</b>           | France, United Kingdom                                                                | <i>P. contorta</i>                                                                                                       | 28, 29, 30                                      |
| <b><i>Cyclaneusma minus</i> (Butin) DiCosmo, Peredo &amp; Minter</b>  | Bulgaria, Germany, Italy, Lithuania, Portugal, Romania, Russia, Spain, United Kingdom | <i>P. sylvestris</i> , <i>P. uncinata</i> , <i>P. mugo</i> , <i>P. radiata</i> , <i>P. pinaster</i> , <i>Pinus</i> spp.  | 5, 7, 8, 13, 18, 15, 31, 11, 32, 33, 34, 35, 26 |
| <b><i>Cyclaneusma niveum</i> (Pers.) DiCosmo, Peredo &amp; Minter</b> | Bulgaria, Slovakia, Spain                                                             | <i>P. halepensis</i> , <i>P. nigra</i> , <i>P. radiata</i> , <i>P. sylvestris</i> , <i>Pinus</i> spp.                    | 36, 13, 18                                      |
| <b><i>Cytospora</i> Ehrenb.</b>                                       | France, Portugal, Spain                                                               | <i>P. sylvestris</i> , <i>P. nigra</i> , <i>P. pinaster</i> , <i>P. pinea</i> , <i>P. radiata</i> , <i>P. halepensis</i> | 37, 38, 39, 22                                  |
| <b><i>Cytospora pinastri</i> Fr.</b>                                  | Romania                                                                               | <i>P. sylvestris</i>                                                                                                     | 40                                              |
| <b><i>Cytospora pini</i> Desm.</b>                                    | Portugal, Slovakia                                                                    | <i>P. pinaster</i> , <i>P. griffithii</i>                                                                                | 3, 17                                           |
| <b><i>Dasyscyphus pini</i> (Brunch.) G.G. Hahn &amp; Ayers</b>        | Russia                                                                                | <i>Pinus</i> spp.                                                                                                        | 41                                              |

Table S2: Common pathogens causing cankers on pines in European forest stands

| Pathogen name                                                  | Country of detection                                                                                                                    | Host species                                                                                                                                                                                                                                                                                                               | References                                                                                                                  |
|----------------------------------------------------------------|-----------------------------------------------------------------------------------------------------------------------------------------|----------------------------------------------------------------------------------------------------------------------------------------------------------------------------------------------------------------------------------------------------------------------------------------------------------------------------|-----------------------------------------------------------------------------------------------------------------------------|
| <b><i>Diplodia africana</i> Damm &amp; Crous</b>               | Italy                                                                                                                                   | <i>P. nigra</i> , <i>P. pinea</i>                                                                                                                                                                                                                                                                                          | 4, 42                                                                                                                       |
| <b><i>Diplodia coryli</i> Fuckel</b>                           | Italy                                                                                                                                   | <i>P. nigra</i>                                                                                                                                                                                                                                                                                                            | 4                                                                                                                           |
| <b><i>Diplodia cupressi</i> A.J.L. Phillips &amp; A. Alves</b> | Italy                                                                                                                                   | <i>P. nigra</i>                                                                                                                                                                                                                                                                                                            | 4                                                                                                                           |
| <b><i>Diplodia sapinea</i> (Fr.) Fuckel</b>                    | Bulgaria, Estonia, France, Greece, Italy, Lithuania, Portugal, Romania, Russia, Slovakia, Spain, Turkey, Ukraine, United Kingdom        | <i>Pinus</i> spp., <i>P. nigra</i> , <i>P. halepensis</i> , <i>P. radiata</i> , <i>P. sylvestris</i> , <i>P. leucodermis</i> , <i>P. mugo</i> , <i>P. pinaster</i> , <i>P. pinea</i> , <i>P. pithyusa</i> , <i>P. bungeana</i> , <i>P. uncinata</i> , <i>P. brutia</i> , <i>P. contorta</i> , <i>Pseudotsuga menziesii</i> | 3, 4, 5, 12, 13, 20, 26, 38, 39, 43, 44, 45, 46, 47, 48, 49, 50, 51, 52, 53, 33, 54, 55, 56, 57, 58, 59, 60, 61, 62, 63, 64 |
| <b><i>Diplodia scrobiculata</i></b>                            | France                                                                                                                                  | <i>Pinus</i> sp.                                                                                                                                                                                                                                                                                                           | 46                                                                                                                          |
| <b><i>Diplodia seriata</i> De Not.</b>                         | Italy                                                                                                                                   | <i>P. nigra</i> <i>P. sylvestris</i>                                                                                                                                                                                                                                                                                       | 4                                                                                                                           |
| <b><i>Fusarium circinatum</i> Nirenberg &amp; O'Donnell</b>    | France, Italy, Portugal, Spain                                                                                                          | <i>Pinus</i> spp, <i>P. halepensis</i> , <i>P. pinea</i> , <i>P. radiata</i> , <i>P. pinaster</i>                                                                                                                                                                                                                          | 65, 66, 67, 68, 69, 70, 71                                                                                                  |
| <b><i>Gremmeniella abietina</i> (Lagerb.) M. Morelet</b>       | Bulgaria, Denmark, Estonia, Finland, France, Germany, Italy, Lithuania, Romania, Russia, Spain, Sweden, Turkey, Ukraine, United Kingdom | <i>Pinus</i> spp., <i>P. nigra</i> , <i>P. sylvestris</i> , <i>P. contorta</i> , <i>P. mugo</i> , <i>P. griffithi</i> , <i>P. ponderosa</i> , <i>P. rigida</i> , <i>P. halepensis</i> , <i>P. pinea</i> , <i>P. cembra</i> , <i>P. sibirica</i>                                                                            | 5, 39, 72, 73, 74, 75, 22, 76, 77, 78, 79, 80, 81, 82, 83, 84, 85, 63, 86                                                   |

Table S2: Common pathogens causing cankers on pines in European forest stands

| Pathogen name                                                           | Country of detection | Host species                            | References |
|-------------------------------------------------------------------------|----------------------|-----------------------------------------|------------|
| <b><i>Helvella calycina</i> Skrede, T.A. Carlsen &amp; T. Schumach.</b> | Germany              | <i>P. mugo</i>                          | 87         |
| <b><i>Lachnellula fusc sanguinea</i> (Rehm) Dennis</b>                  | Germany              | <i>P. mugo</i> , <i>P. cembra</i>       | 87         |
| <b><i>Lachnellula occidentalis</i> (G.G. Hahn &amp; Ayers) Dharne</b>   | Germany              | <i>P. mugo</i>                          | 87         |
| <b><i>Lachnellula reh mii</i> Ferd. &amp; C.A. Jørg.</b>                | Spain                | <i>P. radiata</i> , <i>P. pinaster</i>  | 88         |
| <b><i>Lachnellula suecica</i> (de Bary ex Fuckel) Nannf.</b>            | Germany              | <i>P. mugo</i>                          | 87         |
| <b><i>Leptographium wingfieldii</i> M. Morelet 1988</b>                 | Israel               | <i>P. halepensis</i> , <i>P. brutia</i> | 89         |

Table S2: Common pathogens causing cankers on pines in European forest stands

| Pathogen name                                                                                                  | Country of detection | Host species                                               | References |
|----------------------------------------------------------------------------------------------------------------|----------------------|------------------------------------------------------------|------------|
| <b><i>Melampsora populnea</i> (Pers.) P. Karst.</b>                                                            | Lithuania, Poland    | <i>P. contorta</i> , <i>P. mugo</i> , <i>P. sylvestris</i> | 90, 91, 27 |
| <b><i>Neofusicoccum australe</i> (Slippers, Crous &amp; M.J. Wingf.) Crous, Slippers &amp; A.J.L. Phillips</b> | Italy, Portugal      | <i>P. nigra</i> , <i>P. pinaster</i> , <i>P. pinea</i>     | 4, 55      |
| <b><i>Neofusicoccum luteum</i> (Pennycook &amp; Samuels) Crous, Slippers &amp; A.J.L. Phillips</b>             | Italy, Portugal      | <i>P. nigra</i> , <i>P. pinea</i>                          | 4, 55      |
| <b><i>Neofusicoccum parvum</i> (Pennycook &amp; Samuels) Crous, Slippers &amp; A.J.L. Phillips</b>             | Portugal             | <i>P. pinea</i>                                            | 55         |
| <b><i>Neofusicoccum vitifusiforme</i> (Van Niekerk &amp; Crous) Crous, Slippers &amp; A.J.L. Phillips 2006</b> | Italy                | <i>P. nigra</i>                                            | 4          |

Table S2: Common pathogens causing cankers on pines in European forest stands

| Pathogen name                                                                                 | Country of detection | Host species                                                          | References |
|-----------------------------------------------------------------------------------------------|----------------------|-----------------------------------------------------------------------|------------|
| <b><i>Pachyramichloridium pini</i> (de Hoog &amp; Rahman) C. Nakash., Videira &amp; Crous</b> | United Kingdom       | <i>P. contorta</i>                                                    | 63, 85     |
| <b><i>Pesotum</i> J.L. Crane &amp; Schokn.</b>                                                | Switzerland          | <i>P. sylvestris</i>                                                  | 92         |
| <b><i>Pezicula livida</i> (Berk. &amp; Broome) Rehm</b>                                       | Poland               | <i>P. sylvestris</i>                                                  | 93         |
| <b><i>Phomopsis occulta</i> Traverso</b>                                                      | Poland, Romania      | <i>P. nigra</i> , <i>P. sylvestris</i> , <i>Pseudotsuga menziesii</i> | 94, 64     |
| <b><i>Phomopsis</i> Sacc. &amp; Roum.</b>                                                     | Poland, Spain        | <i>P. nigra</i> , <i>P. sylvestris</i> , <i>P. halepensis</i>         | 39, 94, 95 |
| <b><i>Phytophthora cinnamomi</i> Rands</b>                                                    | Poland               | <i>P. sylvestris</i>                                                  | 96         |
| <b><i>Phytophthora plurivora</i> T. Jung &amp; T.I. Burgess</b>                               | Poland               | <i>P. sylvestris</i>                                                  | 97         |
| <b><i>Plagiostoma</i> Fuckel</b>                                                              | Poland, Spain        | <i>P. sylvestris</i> , <i>P. radiata</i>                              | 95, 98     |
| <b><i>Sarea difformis</i> (Fr.) Fr.</b>                                                       | Russia               | <i>Pinus</i> spp.                                                     | 99         |

Table S2: Common pathogens causing cankers on pines in European forest stands

| Pathogen name                                                 | Country of detection | Host species                                               | References |
|---------------------------------------------------------------|----------------------|------------------------------------------------------------|------------|
| <b><i>Sarea resinae</i> (Fr.) Kuntze</b>                      | Poland               | <i>P. sylvestris</i>                                       | 93         |
| <b><i>Sydowia polyspora</i> (Bref. &amp; Tavel) E. Müll.</b>  | Italy                | <i>P. sylvestris</i>                                       | 15         |
| <b><i>Trichoscyphella fuckelii</i> (Bres. ex Rehm) Svrček</b> | Germany              | <i>P. mugo</i>                                             | 87         |
| <b><i>Truncatella hartigii</i> (Tubeuf) Steyaert</b>          | Italy, Portugal      | <i>P. sylvestris</i> , <i>P. pinea</i> , <i>P. radiata</i> | 15, 54     |

Table S2: Common pathogens causing cankers on pines in European forest stands

## References

1. Zhukov, A. M.; Zhukov, P. D., *Atlas of Fungal Diseases of Seeds of Conifer Trees*. Moscow (Pushkino), 2012; p 36.
2. Sierota, Z.; Szczepkowski, A., *Rozpoznawanie chorób infekcyjnych drzew leśnych*. Centrum Informacyjne Lasów Państwowych: 2014.
3. Pastirčáková, K.; Ivanová, H.; Pastirčák, M., Druhá diverzita húb na boroviciach (*Pinus* spp.) v mestskej a mimomestskej vegetácii [Species diversity of fungi on pines spp. in urban and suburban greenery]. *Dendrologické dni v Arboréte Mlyňany SAV* **2014**, 150-157.
4. Luchi, N.; Oliveira Longa, C.; Danti, R.; Capretti, P.; Maresi, G., *Diplodia sapinea*: the main fungal species involved in the colonization of pine shoots in Italy. *Forest pathology* **2014**, 44 (5), 372-381.
5. Zhukov, A. M.; Gninenko, Y. I.; Zhukov, P. D., *Dangerous and Poorly Studied Diseases of Coniferous Trees in Forests of Russia*. Second edition ed.; Pushkino: Moscow, 2013; p 128.
6. Capretti, P., *Caliciopsis pinea* Peck parassita di *Pinus pinaster* e *Pinus insignis*. *Phytopathologia Mediterranea* **1978**, 101-104.
7. Capretti, P., *Pinus nigra* var. *austriaca*, a new host of *Caliciopsis pinea* Peck. *Informatore Fitopatologico* **1980**, 30 (5), 19-21.
8. Luchi, N.; Capretti, P.; Migliorini, D.; Santini, A., *Caliciopsis* canker: a damaging disease on plantations in Italy. *Joint IUFRO* **2015**, 7 (02).
9. Lanier, L., Note sur une espèce cryptogamique nouvelle pour la France sur différents pins dont le pin maritime des Landes. *Revue forestière française* **1965**.
10. Delatour, C. In *Contribution à l'étude du Caliciopsis pinea* Peck: résultats d'inoculations artificielles et d'essais in vitro, Annales des Sciences Forestières, EDP Sciences: 1967; pp 157-175.
11. Rosnev, B.; Petkov, P., Health status of the Scots pine (*Pinus sylvestris* L.) in representative stands in the Rila mountain. *Forest Science* **1997**, 2, 66-70.
12. Rosnev, B.; BAS, S. B.; Mirchev, P.; BAS, S. B.; Petkov, P.; BAS, S. B.; Georgiev, G.; BAS, S. B.; Tsankov, G.; BAS, S. B., Changes in the Health Condition of the Scots Pine (*Pinus sylvestris* L.) Plantations in Southwestern Bulgaria during the Period 1986-2005. *Plant Science (Bulgaria)* **2008**.
13. Dobрева, M.; Georgieva, M.; Dermendzhiev, P.; Nachev, R.; Velinov, V.; Georgiev, G., Fungal pathogens associated with *Pinus* species in the region of Forest Protection Station Plovdiv in the period 2013-2016. *Forest Science* **2016**, 16 (1-2), 103-116.
14. Von Rack, K.; Scheidemann, U., Über Sukzession und pathogene Eigenschaften Kiefernadeln bewohnender Pilze. *European Journal of Forest Pathology* **1987**, 17 (2), 102-109.
15. Gonthier, P.; Giordano, L.; Nicolotti, G., Further observations on sudden diebacks of Scots pine in the European Alps. *The Forestry Chronicle* **2010**, 86 (1), 110-117.
16. Naceski, S.; Ivanov, B.; Papazov, V.; Papazova, I., Dieback of *Pinus peuce* and *Picea excelsa* in the National Park Pelister. *Plant Protection* **2006**, Vol XVII, 225-235, Skopje.
17. Azevedo, N., Forest tree diseases. *Direcção Geral dos Serviços Florestais e Aquícolas*. Lisboa **1971**.
18. Muñoz López, C.; Pérez Fortea, V.; Cobos Swarez, P.; Hernández Alonso, R.; Sánchez Peña, G., Sanidad Forestal: Guía en imágenes de plagas, enfermedades y otros agentes presentes en los bosques. **2007**.
19. Santamaria, O.; Tejerina, L.; Pajares, J.; Diez, J., Effects of associated fungi *Sclerophoma pythiophila* and *Cenangium ferruginosum* on *Gremmeniella abietina* dieback in Spain. *Forest Pathology* **2007**, 37 (2), 121-128.
20. Zamora, P.; Martínez-Ruiz, C.; Diez, J., Fungi in needles and twigs of pine plantations from northern Spain. *Fungal Divers* **2008**, 30, 171-184.
21. Tsilyurik, A. V.; S.V., S., *Forest Pathology*. a фитопатология, KVIC: Kiev, 2008; p 268.
22. Morelet, M., La maladie à *Brunchorstia*. II. Répartition en France. *European Journal of Forest Pathology* **1980**, 10 (6), 354-359.



Table S2: Common pathogens causing cankers on pines in European forest stands

23. Braun, U., Die Rostpilze (Uredinales) der Deutschen Demokratischen Republik. *Feddes Repertorium* **1982**, 93 (3-4), 213-333.
24. Spaulding, P., Foreign diseases of forest trees of the world. An annotated list. *U.S.D.A. Agric. Handb* **1961**, 197, 1-361.
25. Simionescu, A.; Chira, D.; Mihalcic, V.; Ciornei, C.; Tulbure, C., *Forest health status in Romania in 2001-2010*. Suceava, 2012.
26. Strouts, R. G.; Winter, T. G., *Diagnosis of ill-health in trees. Second edition*. HMSO: 2000.
27. Minkevicius, A.; Ignataviciute, M., *Lietuvos grybai*. V, V. Vilnius, 1991.
28. Hayes, A., The occurrence of *Crumenula sororia* Karst. on lodgepole pine in the United Kingdom. *Forestry: An International Journal of Forest Research* **1973**, 46 (2), 125-126.
29. Phillips, D. H.; Burdekin, D. A., *Diseases of forest and ornamental trees*. Springer: 1992.
30. Morelet, M., La maladie chancreuse du pin d'Alep. I. Inventaire des champignons associés aux chancres. *Publications de la Société Linnéenne de Lyon* **1971**, 40 (9), 265-269.
31. Giordano, L.; Gonthier, P., An outbreak of *Cyclaneusma minus* needle cast on Swiss mountain pine (*Pinus uncinata*) in Italy. *Journal of Plant Pathology* **2011**, 93 (4, Supplement).
32. Kutorga, E.; Irsenaite, R.; Iznova, T.; Kasparavicius, J.; Markovskaja, S.; Motiejunaite, J., Species diversity and composition of fungal communities in a Scots pine forest affected by the great cormorant colony. *Acta Mycologica* **2013**, 48 (2).
33. Drenkhan, R.; Tomešová-Haataja, V.; Fraser, S.; Bradshaw, R.; Vahalík, P.; Mullett, M.; Martín-García, J.; Bulman, L.; Wingfield, M.; Kirisits, T., Global geographic distribution and host range of *Dothistroma* species: a comprehensive review. *Forest Pathology* **2016**, 46 (5), 408-442.
34. Lotz-Winter, H.; Hofmann, T.; Kirschner, R.; Kursawe, M.; Trampe, T.; Piepenbring, M., Fungi in the Botanical Garden of the University of Frankfurt. *Zeitschrift für Mykologie* **2011**, 77, 89-122.
35. Crișan, A.; Chira, D.; Isaia, G.; Marcu, V., Pine needle diseases in Brașov zone. *Revista de Silvicultură și Cinegetică* **2015**, 20 (36), 34-37.
36. Ivanova, H., Fungi associated with a decline of *Pinus nigra* in urban greenery. *Acta Fytotechnica et Zootechnica* **2015**, 18 (2), 36-43.
37. Martínez-Alvarez, P.; Rodríguez-Ceinós, S.; Martín-García, J.; Diez, J., Monitoring endophyte populations in pine plantations and native oak forests in Northern Spain. *Forest Systems* **2012**, 21 (3), 373-382.
38. Bragança, H.; Inácio, M. L.; Diogo, E., Detection Of Pine Needle Diseases In Portugal. In *Cost Action Fp1102 – DIAROD Annual Workshop*, Aberdeen, UK, 2012.
39. Botella, L.; Santamaría, O.; Diez, J., Fungi associated with the decline of *Pinus halepensis* in Spain. *Fungal Diversity* **2010**, 40 (1), 1-11.
40. Diamandis, S.; Perlerou, C., *Management of a severe attack of Peridermium pini on Scots pine at the southernmost limit of its extension in Europe*. 2002.
41. Kuz'michev, E. P.; Sokolova, E. S.; Mozolevskaya, E. G., *Diseases of woody plants. Reference book. (Diseases and pests in forests of Russia. Vol. 1)*. VNIILM, Moscow: 2004; p 120.
42. Bosso, L.; Luchi, N.; Maresi, G.; Cristinzio, G.; Smeraldo, S.; Russo, D., Predicting current and future disease outbreaks of *Diplodia sapinea* shoot blight in Italy: species distribution models as a tool for forest management planning. *Forest Ecology and Management* **2017**, 400, 655-664.
43. Georgiev, G.; Georgieva, M.; Mirchev, P.; Zhiyanski, M., Main insect pests and fungal pathogens on tree and shrub vegetation in urban ecosystems. *Hlorind Ltd., Sofia* **2017**.
44. Hanso, M.; Drenkhan, R., *Diplodia pinea* is a new pathogen on Austrian pine (*Pinus nigra*) in Estonia. *Plant Pathology* **2009**, 58 (4), 797-797.
45. Adamson, K.; Drenkhan, R.; Hanso, M., Invasive brown spot needle blight caused by *Lecanosticta acicola* in Estonia. *Scandinavian journal of forest research* **2015**, 30 (7), 587-593.
46. Fabre, B.; Piou, D.; Desprez-Loustau, M.-L.; Marçais, B., Can the emergence of pine *Diplodia* shoot blight in France be explained by changes in pathogen pressure linked to climate change? *Global Change Biology* **2011**, 17, 3218-3227.
47. Kailidis, D., Forest pathology. *Giapouli-Giahoudi* **1984**, 545.

Table S2: Common pathogens causing cankers on pines in European forest stands

48. Danti, R.; Capretti, P., Shoot blight of *Pinus halepensis* Mill. in the Italian peninsula. *Foliage, Shoot and Stem diseases of Trees* **1998**, 25-31.
49. Feci, E.; Battisti, A.; Capretti, P.; Tegli, S., An association between the fungus *Sphaeropsis sapinea* and the cone bug *Gastrodes grossipes* in cones of *Pinus nigra* in Italy. *Forest Pathology* **2002**, 32 (4-5), 241-247.
50. Franceschini, A.; Linaldeddu, B.; Deriu, L., *Sphaeropsis sapinea* associated to dieback of *Pinus radiata* in Sardinia. *Informatore Fitopatologico* **2006**, 56 (1), 54-58.
51. Santini, A.; Pepori, A.; Ghelardini, L.; Capretti, P., Persistence of some pine pathogens in coarse woody debris and cones in a *Pinus pinea* forest. *Forest ecology and management* **2008**, 256 (3), 502-506.
52. Kutorga, E.; Adamonytė, G.; Iršėnaitė, R.; Kasparavičius, J.; Markovskaja, S.; Motiejūnaitė, J.; Treigienė, A., A checklist of mycobiota recorded in burnt and unburnt *Pinus mugo* plantations in the Curonian Spit (Lithuania). *Botanica Lithuanica* **2012**, 18 (1), 66-79.
53. Markovskaja, S.; Kačergius, A.; Davydenko, K.; Fraser, S., First record of *Neocatenulostroma germanicum* on pines in Lithuania and Ukraine and its co-occurrence with *Dothistroma* spp. and other pathogens. *Forest pathology* **2016**, 46 (5), 522-533.
54. Branco, M.; Bragança, H.; Sousa, E.; Phillips, A. J., Pests and diseases in Portuguese forestry: current and new threats. In *Forest context and policies in Portugal*, Springer: 2014; pp 117-154.
55. Alves, A.; Barradas, C.; Phillips, A. J.; Correia, A., Diversity of Botryosphaeriaceae species associated with conifers in Portugal. *European Journal of Plant Pathology* **2013**, 135 (4), 791-804.
56. Juhasova, G.; Adamcikova, K.; Kobza, M., Sphaeropsis tip blight disease of Austrian pine in urban greenery. *Hortic. Sci* **2006**, 33, 11-15.
57. García-Serna, I. *Diplodia pinea* (Desm.) Kickx y *Fusarium circinatum* Nirenberg & O'Donell, principales hongos de chancro de las masas forestales de *Pinus radiata* D. Don del País Vasco. Universidad del País Vasco-Euskal Herriko Unibertsitatea, 2011.
58. Iturrutxa, E.; Ganley, R.; Raposo, R.; García-Serna, I.; Mesanza, N.; Kirkpatrick, S.; Gordon, T., Resistance levels of Spanish conifers against *Fusarium circinatum* and *Diplodia pinea*. *Forest Pathology* **2013**, 43 (6), 488-495.
59. Hernandez-Escribano, L.; Iturrutxa, E.; Aragonés, A.; Mesanza, N.; Berbegal, M.; Raposo, R.; Elvira-Recuenco, M., Root Infection of Canker Pathogens, *Fusarium circinatum* and *Diplodia sapinea*, in Asymptomatic Trees in *Pinus radiata* and *Pinus pinaster* Plantations. *Forests* **2018**, 9 (3), 128.
60. Soyulu, S.; Kurt, Ş.; Soyulu, E., Determination of important fungal disease agents on pine trees in the Kahramanmaraş regional forests. *Journal of Turkish Phytopathology* **2001**, 30, 79.
61. Doğmuş-Lehtijärvi, H.; Kaya, A. G. A.; Lehtijärvi, A.; Oskay, F.; Kaya, Ö. D., Occurrence and genetic similarity of *Diplodia pinea* on shoots and cones in seed orchards of *Pinus* spp. in north-western Turkey. *Plant Protection Science* **2014**, 50 (4), 217-220.
62. Davydenko, K.; Vasaitis, R.; Menkis, A., Fungi associated with *Ips acuminatus* (Coleoptera: Curculionidae) in Ukraine with a special emphasis on pathogenicity of ophiostomatoid species. **2017**.
63. Brown, A.; Macaskill, G., Shoot diseases of pine. Information note. Commision, F., Ed. Forestry Commision: Edinburgh, 2005.
64. Petrescu, M., Aspecte fitopatologice din padurile din RS Romania. *Bucureşti, Edit. agro-silvică* **1966**.
65. EFSA, P. o. P. H., Risk assessment of *Gibberella circinata* for the EU territory and identification and evaluation of risk management options. *Efsa Journal* **2010**, 8 (6), 1620.
66. Ios, R.; Aloj, F.; Piškur, B.; Guinet, C.; Mullett, M.; Berbegal, M.; Bragança, H.; Cacciola, S. O.; Oskay, F.; Cornejo, C., Transferability of PCR-based diagnostic protocols: An international collaborative case study assessing protocols targeting the quarantine pine pathogen *Fusarium circinatum*. *Scientific reports* **2019**, 9 (1), 8195.
67. Carlucci, A.; Colatruglio, L.; Frisullo, S., First report of pitch canker caused by *Fusarium circinatum* on *Pinus halepensis* and *P. pinea* in Apulia (Southern Italy). *Plant Disease* **2007**, 91 (12), 1683-1683.

Table S2: Common pathogens causing cankers on pines in European forest stands

68. Bragança, H.; Diogo, E.; Moniz, F.; Amaro, P., First report of pitch canker on pines caused by *Fusarium circinatum* in Portugal. *Plant Disease* **2009**, *93* (10), 1079-1079.
69. Landeras, E.; García, P.; Fernández, Y.; Braña, M.; Fernández-Alonso, O.; Méndez-Lodos, S.; Pérez-Sierra, A.; León, M.; Abad-Campos, P.; Berbegal, M., Outbreak of pitch canker caused by *Fusarium circinatum* on *Pinus* spp. in northern Spain. *Plant Disease* **2005**, *89* (9), 1015-1015.
70. Pérez-Sierra, A.; Landeras, E.; León, M.; Berbegal, M.; García-Jiménez, J.; Armengol, J., Characterization of *Fusarium circinatum* from *Pinus* spp. in northern Spain. *Mycological research* **2007**, *111* (7), 832-839.
71. Iturrutxa, E.; Mesanza, N.; Brenning, A., Spatial analysis of the risk of major forest diseases in Monterey pine plantations. *Plant Pathology* **2014**, *64* (4), 880-889.
72. Rosnev, B.; Petkov, P., Intensity of pathological mortality of *Pinus nigra* in some regions of Bulgaria. *Nauka za Gorata* **1990**, *27* (3), 72-76.
73. Læssøe, T.; Petersen, J. H.; Heilmann-Clausen, J.; Søjting, U.; Frøslev, T.; Jeppesen, T. S. Danish Mycological Society - Checklist of Fungi. Version 1.8. <https://doi.org/10.15468/9zvquf> (accessed 2018-03-28).
74. Drenkhan, R.; Hanso, M.; Kreutzwaldi, F. R., Alterations of Scots pine needle characteristics after severe weather conditions in south-eastern Estonia. *Forest pathology research in the Nordic and Baltic countries 2005* **2006**, 63.
75. Nevalainen, S., *Gremmeniella abietina* in Finnish *Pinus sylvestris* stands in 1986-1992: a study based on the National Forest Inventory. *Scandinavian Journal of Forest Research* **1999**, *14* (2), 111-120.
76. EFSA; Jeger, M.; Bragard, C.; Caffier, D.; Candresse, T.; Chatzivassiliou, E.; Dehnen-Schmutz, K.; Gilioli, G.; Gregoire, J. C.; Jaques Miret, J. A., Pest categorisation of *Gremmeniella abietina*. *EFSA Journal* **2017**, *15* (11), e05030.
77. Hamelin, R. C.; Lecours, N.; Hansson, P.; Hellgren, M.; Laflamme, G., Genetic differentiation within the European race of *Gremmeniella abietina*. *Mycological research* **1996**, *100* (1), 49-56.
78. Moriondo, F., Nuovi reperti fitopatologici nei boschi italiani. *Ann. Accad. Ital. Sci. For* **1963**, *12*, 313-345.
79. Barbacovi, A.; Capretti, P.; Moriondo, F., Diffusione e danni di *Brunchorstia pinea* (Karst.) Hohn. su popolamenti naturali e artificiali di conifere in Italia. *Annali-Accademia italiana di scienze forestali* **1979**.
80. Vasiliauskas, A.; Dabkevičius, Z.; Žiogas, A., Miško fitopatologija:[vadovėlis]/Zenonas Dabkevičius, Albertas Vasiliauskas, Algimantas Žiogas;[sudarytojas ir atsakingasis redaktorius Algimantas Žiogas]; Lietuvos Respublikos aplinkos ministerija, Lietuvos žemės ūkio universitetas. **2006**.
81. Karlman, M.; Hansson, P.; Witzell, J., Scleroderris canker on lodgepole pine introduced in northern Sweden. *Canadian Journal of Forest Research* **1994**, *24* (9), 1948-1959.
82. Hansson, P., *Gremmeniella abietina* in northern Sweden: Silvicultural aspects of disease development in the introduced *Pinus contorta* and in *Pinus sylvestris*. **1998**.
83. Çolak, A., Effects of microsite conditions on Scots pine (*Pinus sylvestris* L.) seedlings in high-elevation plantings. *Forstwissenschaftliches Centralblatt vereinigt mit Tharandter forstliches Jahrbuch* **2003**, *122* (1), 36-46.
84. Davydenko, K.; Meshkova, V., Prevalence of pathogens of needles and shoots in pine seedlings in the Kharkiv region. *Journal of Kharkiv National Agricultural University (KNAU). Phytopathology and Entomology* **2011**, *9*, 57-62.
85. Gregory, S.; Redfern, D., *Diseases and disorders of forest trees: A guide to identifying causes of ill-health in woods and plantations*. HMSO Publications Centre: 1998.
86. Georgescu, C., *Bolile si daunatorii padurilor: Biologie si combatere*. Ed. Agro-Silvica de Stat: 1957.
87. Schmid-Heckel, H., *Zur Kenntnis der Pilze in den Nördlichen Kalkalpen: mykologische Untersuchungen im Nationalpark Berchtesgaden*. Nationalpark Berchtesgaden: 1985; Vol. 8.

Table S2: Common pathogens causing cankers on pines in European forest stands

88. Tierra, H. d. « *Lachnellula rehmlii* », nuevo patógeno que afecta a los pinos en el norte de España. <https://www.hifasforesta.com/blog/lachnellula-rehmlii-nuevo-patogeno-de-pinos-en-el-norte-de-espana/> (accessed 26/08/2019).
89. Dori-Bachash, M.; Avrahami-Moyal, L.; Protasov, A.; Mendel, Z.; Freeman, S., The occurrence and pathogenicity of *Geosmithia* spp. and common blue-stain fungi associated with pine bark beetles in planted forests in Israel. *European Journal of Plant Pathology* **2015**, *143* (4), 627-639.
90. Žiogas, A.; Juronis, V.; Snieškienė, V., Pathological condition of *Larix* in Lithuania. *Insects and Fungi in Storm Areas: proceedings of the IUFRO Working Party 7.03. 10, Methodology of Forest Insect and Disease Survey in Central Europe, September 15 to 19, 2008 Štrbské Pleso, Slovakia*/ed. A. Kunca, M. Zubrik. Zvolen: Forest Research Institute, 2009 **2009**.
91. Domański, S.; Kowalski, T., Untypical die-back of the current season's shoots of *Pinus sylvestris* in Poland. *European journal of forest pathology* **1988**, *18* (3-4), 157-160.
92. Heiniger, U.; Theile, F.; Rigling, A.; Rigling, D., Blue-stain infections in roots, stems and branches of declining *Pinus sylvestris* trees in a dry inner alpine valley in Switzerland. *Forest Pathology* **2011**, *41* (6), 501-509.
93. Donaubaue, E., Distribution and hosts of *Scleroderris lagerbergii* in Europe and North America. *European Journal of Forest Pathology* **1972**, *2* (1), 6-11.
94. Kowalski, T.; Zych, P., Fungi isolated from living symptomless shoots of *Pinus nigra* growing in different site conditions. *Osterr Z Pilzkd* **2002**, *11*, 107-16.
95. Król, E. D.; Machowicz-Stefaniak, Z.; Zimowska, B.; Abramczyk, B. A.; Zalewska, E. D., Grzyby zasiedlające nasiona wybranych gatunków drzew leśnych. *sylvan* **2015**, *159* (02).
96. Orlikowski, L. B.; Oszako, T.; Ptaszek, M., Zagrożenie szkółek leśnych przez gatunki *Phytophthora*. *Sylvan* **2011**, *155* (5), 322-329.
97. Tkaczyk, M.; Sikora, K.; Nowakowska, J. A.; Aniśko, E.; Oszako, T.; Belbahri, L.; Milenković, I., Four different *Phytophthora* species that are able to infect Scots pine seedlings in laboratory conditions. *Folia Forestalia Polonica* **2016**, *58* (3), 123-130.
98. Martínez-Álvarez, P.; Alves-Santos, F. M.; Diez, J. J., In vitro and in vivo interactions between *Trichoderma viride* and *Fusarium circinatum*. *Silva Fennica* **2012**, *46* (3), 303-316.
99. Semenkova, I.; Sokolova, E., *Phytopathology*. Academy, Moscow: 2003; p 480.
