# Supplementary material
Source: MDPI journal article supplement (https://www.mdpi.com/1999-4907/11/1/7)
Supplement: s1 [file s1]

Table S4: Common pathogens causing vascular stain on pines in European forest stands

| Pathogen name                                                                                                              | Country of detection | Host species                                                 | References |
|----------------------------------------------------------------------------------------------------------------------------|----------------------|--------------------------------------------------------------|------------|
| <i>Biscogniauxia mediterranea</i> (De Not.) Kuntze                                                                         | Spain                | <i>P. sylvestris</i>                                         | 1          |
| <i>Cenangium ferruginosum</i> Fr.                                                                                          | Lithuania            | <i>P. sylvestris</i>                                         | 2          |
| <i>Ceratocystis brunneocrinita</i> E.F. Wright & Cain                                                                      | Spain                | <i>P. pinaster</i>                                           | 3          |
| <i>Ceratostomella comate</i> V.V. Mill. & Tcherntz.                                                                        | Romania              | <i>P. nigra</i> , <i>P. sylvestris</i>                       | 4          |
| <i>Fusarium sporotrichioides</i> Sherb.                                                                                    | Lithuania            | <i>P. mugo</i>                                               | 5          |
| <i>Graphilbum cf. rectangulosporium</i> Graphilbum rectangulosporium (Ohtaka, Masuya & Yamaoka) Z.W. de Beer & M.J. Wingf. | Ukraine              | <i>P. sylvestris</i>                                         | 6          |
| <i>Graphium</i> Corda                                                                                                      | Poland, Ukraine      | <i>P. sylvestris</i>                                         | 7, 8       |
| <i>Gremmeniella abietina</i> (Lagerb.) M. Morelet                                                                          | France, Ukraine      | <i>P. sylvestris</i>                                         | 9, 10      |
| <i>Grosmannia olivacea</i> (Math.-Käärik) Zipfel, Z.W. de Beer & M.J. Wingf.                                               | Ukraine              | <i>P. sylvestris</i>                                         | 8          |
| <i>Coniochaeta hoffmannii</i> (J.F.H. Beyma) Z.U. Khan, Gené & Guarro                                                      | Lithuania            | <i>P. mugo</i>                                               | 5          |
| <i>Leptographium guttulatum</i> M.J. Wingf. & K. Jacobs                                                                    | Italy                | <i>P. pinaster</i> <i>P. pinea</i>                           | 11         |
| <i>Leptographium lundbergii</i> Lagerb. & Melin                                                                            | Italy, Poland        | <i>P. pinaster</i> <i>P. pinea</i> ,<br><i>P. sylvestris</i> | 7, 11      |
| <i>Leptographium procerum</i> (W.B. Kendr.) M.J. Wingf.                                                                    | Lithuania, Poland    | <i>P. mugo</i> , <i>P. sylvestris</i>                        | 5, 7, 12   |

Table S4: Common pathogens causing vascular stain on pines in European forest stands

|                                                                                               |                                              |                                                              |                  |
|-----------------------------------------------------------------------------------------------|----------------------------------------------|--------------------------------------------------------------|------------------|
| <i>Leptographium serpens</i> (Goid.) M.J. Wingf.                                              | Italy                                        | <i>P. pinaster</i> , <i>P. pinea</i>                         | 11               |
| <i>Leptographium Lagerb. &amp; Melin</i>                                                      | France, Switzerland                          | <i>Pinus halepensis</i> , <i>P. sylvestris</i>               | 13, 14           |
| <i>Leptographium wingfieldii</i> M. Morelet                                                   | Italy, Poland                                | <i>P. pinaster</i> <i>P. pinea</i> ,<br><i>P. sylvestris</i> | 7, 11            |
| <i>Ophiostoma bicolor</i> R.W. Davidson & D.E. Wells                                          | Ukraine                                      | <i>P. sylvestris</i>                                         | 6                |
| <i>Ophiostoma brunneociliatum</i> Math.-Käärik                                                | France, Italy                                | <i>P. sylvestris</i>                                         | 15, 16           |
| <i>Ophiostoma canum</i> (Münch) Syd. & P. Syd.                                                | Ukraine                                      | <i>P. sylvestris</i>                                         | 6                |
| <i>Ophiostoma fasciatum</i> (Olchow. & J. Reid)<br>Georg Hausner, J. Reid & Klassen           | Spain                                        | <i>P. pinaster</i>                                           | 3                |
| <i>Ophiostoma ips</i> (Rumbold) Nannf.                                                        | Italy, Spain                                 | <i>P. sylvestris</i> , <i>P. pinaster</i>                    | 3, 15, 17        |
| <i>Ophiostoma minor</i> (Hedgc.) Syd. & P. Syd.                                               | Romania                                      | <i>P. nigra</i> , <i>P. sylvestris</i>                       | 4                |
| <i>Ophiostoma minus</i> (Hedgc.) Syd. & P. Syd.                                               | France, Spain, Italy,<br>Switzerland, Poland | <i>P. pinaster</i>                                           | 3, 7, 13, 14, 17 |
| <i>Ophiostoma pallidobrunneum</i> (Olchow. & J. Reid)<br>Georg Hausner & J. Reid              | Spain                                        | <i>P. pinaster</i>                                           | 3                |
| <i>Ophiostoma pallidulum</i> Linnakoski, Z.W. de Beer & M.J. Wingf.                           | Poland, Ukraine                              | <i>P. sylvestris</i>                                         | 8, 12            |
| <i>Ophiostoma piceae</i> (Münch) Syd. & P. Syd.                                               | Poland, Ukraine,<br>Russia                   | <i>P. sylvestris</i> , <i>Pinus</i><br>spp.                  | 6, 7, 18         |
| <i>Ophiostoma piliferum</i> (Fr.) Syd. & P. Syd.                                              | Spain                                        | <i>P. pinaster</i>                                           | 3, 17            |
| <i>Ophiostoma ranaculosum</i> (J.R. Bridges & T.J. Perry)<br>Georg Hausner, J. Reid & Klassen | Spain                                        | <i>P. pinaster</i>                                           | 3                |

Table S4: Common pathogens causing vascular stain on pines in European forest stands

|                                                       |          |                                |    |
|-------------------------------------------------------|----------|--------------------------------|----|
| <b><i>Pesotum piceae</i> J.L. Crane &amp; Schokn.</b> | Romania  | <i>P. nigra, P. sylvestris</i> | 4  |
| <b><i>Stereum hirsutum</i> (Willd.) Pers.</b>         | Slovakia | <i>P. balsamea</i>             | 19 |

Table S4: Common pathogens causing vascular stain on pines in European forest stands

## References

1. Sanz-Ros, A. V.; Müller, M. M.; San Martín, R.; Diez, J. J., Fungal endophytic communities on twigs of fast and slow growing Scots pine (*Pinus sylvestris* L.) in northern Spain. *Fungal biology* **2015**, *119* (10), 870-883.
2. Kutorga, E.; Irsenaite, R.; Iznova, T.; Kasparavicius, J.; Markovskaja, S.; Motiejunaite, J., Species diversity and composition of fungal communities in a Scots pine forest affected by the great cormorant colony. *Acta Mycologica* **2013**, *48* (2).
3. Prieto-Recio, C. Biotic, abiotic and management factors involved in *Pinus pinaster* decline in the Iberian Peninsula. 2016.
4. Ditu, I.; Patrascoiu, M.; Stanescu, E., Researches on Ceratocystis fungi which cause chromatic alteration of pine wood. *Anale ICAS* **1974**, *30*, 35-60.
5. Lygis, V.; Vasiliauskaite, I.; Matelis, A.; Pliūra, A.; Vasaitis, R., Fungi in living and dead stems and stumps of *Pinus mugo* on coastal dunes of the Baltic Sea. *Plant Protection Science* **2014**, *50* (4), 221-226.
6. Davydenko, K.; Vasaitis, R.; Meshkova, V.; Menkis, A., Fungi associated with the red-haired bark beetle, *Hylurgus ligniperda* (Coleoptera: Curculionidae) in the forest-steppe zone in eastern Ukraine. *European Journal of Entomology* **2014**, *111* (4), 561.
7. Jankowiak, R., Fungi associated with *Tomicus piniperda* in Poland and assessment of their virulence using Scots pine seedlings. *Annals of Forest Science* **2006**, *63* (7), 801-808.
8. Davydenko, K.; Vasaitis, R.; Menkis, A., Fungi associated with *Ips acuminatus* (Coleoptera: Curculionidae) in Ukraine with a special emphasis on pathogenicity of ophiostomatoid species. **2017**.
9. Davydenko, K.; Meshkova, V., Prevalence of pathogens of needles and shoots in pine seedlings in the Kharkiv region. *Journal of Kharkiv National Agricultural University (KNAU). Phytopathology and Entomology* **2011**, *9*, 57-62.
10. Morelet, M., La maladie à Brunchorstia. II. Répartition en France. *European Journal of Forest Pathology* **1980**, *10* (6), 354-359.
11. Peverieri, G. S.; Capretti, P.; Tiberi, R., Associations between *Tomicus destruens* and *Leptographium* spp. in *Pinus pinea* and *P. pinaster* stands in Tuscany, central Italy. *Forest Pathology* **2006**, *36* (1), 14-20.
12. Jankowiak, R.; Bilański, P.; Kolařík, M.; Wasiuta, D., Root-colonizing ophiostomatoid fungi associated with dying and dead young Scots pine in Poland. *Forest Pathology* **2012**, *42* (6), 492-500.
13. Ios, R.; Fabre, B.; Saurat, C.; Fourrier, C.; Frey, P.; Marçais, B., Development, Comparison, and Validation of Real-Time and Conventional PCR Tools for the Detection of the Fungal Pathogens Causing Brown Spot and Red Band Needle Blights of Pine. *Phytopathology* **2009**, *100* (1), 105-114.
14. Heiniger, U.; Theile, F.; Rigling, A.; Rigling, D., Blue-stain infections in roots, stems and branches of declining *Pinus sylvestris* trees in a dry inner alpine valley in Switzerland. *Forest Pathology* **2011**, *41* (6), 501-509.
15. Faccoli, M.; Colombari, F.; Dal Pont, C.; Finozzi, V.; D'Ambros, E.; Battisti, A., Large outbreaks of *Ips acuminatus* in Scots pine stands of the Italian Alps. *Forest@* **2010**.
16. Guérard, N.; Dreyer, E.; Lieutier, F., Interactions between Scots pine, *Ips acuminatus* (Gyll.) and *Ophiostoma brunneo-ciliatum* (Math.): estimation of the critical thresholds of attack and inoculation densities and effects on hydraulic properties in the stem. *Annals of Forest Science* **2000**, *57* (7), 681-690.
17. Álvarez, G.; Fernández, M.; Casero, J. J. D., Ophiostomatoid fungi associated with declined *Pinus pinaster* stands in Spain. *Forest systems* **2015**, *24* (1), 6.
18. Zhukov, A. M.; Gninenko, Y. I.; Zhukov, P. D., *Dangerous and Poorly Studied Diseases of Coniferous Trees in Forests of Russia*. Second edition ed.; Pushkino: Moscow, 2013; p 128.

Table S4: Common pathogens causing vascular stain on pines in European forest stands

19. Pastirčáková, K.; Ivanová, H.; Pastirčák, M., Druhová diverzita húb na boroviciach (Pinus spp.) v mestskej a mimomestskej vegetácii [Species diversity of fungi on pines spp. in urban and suburban greenery]. *Dendrologické dni v Arboréte Mlyňany SAV* **2014**, 150-157.
