# Supplementary material
Source: MDPI journal article supplement (https://www.mdpi.com/1999-4907/11/1/7)
Supplement: s1 [file s1]

Table S3: Common pathogens causing leaf damage on pines in European forest stands

| Pathogen name                                               | Country of detection     | Host species                                                           | References |
|-------------------------------------------------------------|--------------------------|------------------------------------------------------------------------|------------|
| <b><i>Acremonium</i> Link</b>                               | France                   | <i>P. nigra</i>                                                        | 1          |
| <b><i>Alternaria alternata</i> (Fr.) Keissl.</b>            | Germany, Spain, Ukraine  | <i>P. sylvestris</i> , <i>P. halepensis</i>                            | 2, 3, 4    |
| <b><i>Alternaria</i> Nees</b>                               | Spain                    | <i>P. pinaster</i>                                                     | 5          |
| <b><i>Asterosporium asterospermum</i> (Pers.) S. Hughes</b> | Slovakia                 | <i>P. nigra</i>                                                        | 6          |
| <b><i>Botryotinia fuckeliana</i> (de Bary) Whetzel</b>      | Spain                    | <i>Pinus</i> spp.                                                      | 7          |
| <b><i>Botrytis cinerea</i> Pers.</b>                        | Germany, Romania, Russia | <i>P. sylvestris</i> , <i>Pinus</i> spp., <i>Pseudotsuga menziesii</i> | 2, 8, 9    |
| <b><i>Botrytis</i> P. Micheli ex Haller</b>                 | France, Spain            | <i>P. nigra</i> , <i>P. radiata</i> , <i>P. pinaster</i>               | 1, 3, 10   |
| <b><i>Camarosporium pini</i> (Westend.) Sacc.</b>           | Slovakia                 | <i>P. nigra</i> , <i>P. ponderosa</i>                                  | 11, 12     |
| <b><i>Coleosporium cacaliae</i> G.H. Otth</b>               | Germany                  | <i>P. sylvestris</i> , <i>P. mugo</i>                                  | 13         |
| <b><i>Coleosporium campanulae</i> (Pers.) Tul.</b>          | Germany, Lithuania       | <i>P. sylvestris</i>                                                   | 14, 15     |
| <b><i>Coleosporium euphrasiae</i> (Schumach.)</b>           | Germany, Lithuania       | <i>P. sylvestris</i>                                                   | 14, 15     |

Table S3: Common pathogens causing leaf damage on pines in European forest stands

| Pathogen name                                                       | Country of detection                               | Host species                                                                                              | References    |
|---------------------------------------------------------------------|----------------------------------------------------|-----------------------------------------------------------------------------------------------------------|---------------|
| <i>Coleosporium inulae</i> Rabenh.                                  | Germany                                            | <i>P. sylvestris</i>                                                                                      | 14            |
| <i>Coleosporium</i> Lév.                                            | Bulgaria, Slovakia                                 | <i>P. mugo</i> , <i>P. sylvestris</i> , <i>P. halepensis</i> , <i>P. nigra</i> , <i>P. radiata</i>        | 6, 16, 17, 18 |
| <i>Coleosporium melampyri</i> (Rebent.) Kleb.                       | Germany, Lithuania                                 | <i>P. sylvestris</i>                                                                                      | 14, 15        |
| <i>Coleosporium sonchi</i> (F. Strauss) Lév.                        | Germany                                            | <i>P. sylvestris</i>                                                                                      | 14            |
| <i>Coleosporium tussilaginis</i> (Pers.) Lév.                       | Germany, Lithuania, Romania, Spain, United Kingdom | <i>P. nigra</i> , <i>P. sylvestris</i> , <i>Pinus</i> spp.                                                | 7, 14, 19, 9  |
| <i>Coniothyrium</i> Corda                                           | France                                             | <i>P. nigra</i>                                                                                           | 1             |
| <i>Coniothyrium dispersellum</i> P. Karst.                          | Lithuania                                          | <i>P. mugo</i>                                                                                            | 20            |
| <i>Cronartium flaccidum</i> (Alb. & Schwein.) G. Winter             | Germany, Lithuania                                 | <i>P. sylvestris</i>                                                                                      | 14, 15        |
| <i>Cronartium ribicola</i> J.C. Fisch.                              | Lithuania, United Kingdom                          | <i>P. strobus</i> , <i>P. sibirica</i> , <i>P. flexilis</i> , <i>P. lambertiana</i> , <i>P. monticola</i> | 15, 21        |
| <i>Cyclaneusma niveum</i> (Persoon) DiCosmo, Peredo & Minter (1983) | Germany, Spain                                     | <i>P. halepensis</i> , <i>P. nigra</i> , <i>P. pinaster</i> , <i>P. pinea</i>                             | 4, 14         |

Table S3: Common pathogens causing leaf damage on pines in European forest stands

| Pathogen name                                                               | Country of detection                                                                          | Host species                                                                                                                                                                                                                                                                                                                                                                                                                                                                                                                                                                                                                                                                | References                                                 |
|-----------------------------------------------------------------------------|-----------------------------------------------------------------------------------------------|-----------------------------------------------------------------------------------------------------------------------------------------------------------------------------------------------------------------------------------------------------------------------------------------------------------------------------------------------------------------------------------------------------------------------------------------------------------------------------------------------------------------------------------------------------------------------------------------------------------------------------------------------------------------------------|------------------------------------------------------------|
| <b><i>Cyclaneusma minor</i> (Butin) DiCosmo, Peredo &amp; Minter (1983)</b> | Bulgaria, Romania                                                                             | <i>P. sylvestris</i>                                                                                                                                                                                                                                                                                                                                                                                                                                                                                                                                                                                                                                                        | 22, 26, 56                                                 |
| <b><i>Diplodia sapinea</i> (Fr.) Fuckel</b>                                 | Romania, Portugal                                                                             | <i>P. nigra</i> , <i>P. sylvestris</i> , <i>P. pinaster</i> , <i>P. pinea</i>                                                                                                                                                                                                                                                                                                                                                                                                                                                                                                                                                                                               | 23, 24                                                     |
| <b><i>Dothistroma pini</i> Hulbary</b>                                      | Bulgaria, France, Russia, Slovakia, Spain                                                     | <i>Pinus</i> spp., <i>P. nigra</i> subsp. <i>laricio</i> , <i>P. nigra</i> subsp. <i>austriaca</i> , <i>P. mugo</i> , <i>P. aristata</i> , <i>P. coulteri</i> , <i>P. densiflora</i> , <i>P. flexilis</i> , <i>P. jeffreyi</i> , <i>P. schwerinii</i> , <i>P. sylvestris</i> , <i>P. ponderosa</i> , <i>Pinus nigra</i> subsp. <i>pallasiana</i>                                                                                                                                                                                                                                                                                                                            | 25, 26, 17, 27, 28, 29, 30, 31, 32, 33                     |
| <b><i>Dothistroma septosporum</i> (Dorog.) M. Morelet</b>                   | Finland, France, Germany, Greece, Lithuania, Romania, Russia, Slovakia, Spain, United Kingdom | <i>Pinus</i> sp., <i>Pinus brutia</i> , <i>Pinus nigra</i> subsp. <i>laricio</i> , <i>P. nigra</i> subsp. <i>austriaca</i> , <i>P. pinaster</i> , <i>P. sylvestris</i> , <i>P. heldreichii</i> , <i>P. mugo</i> , <i>P. nigra</i> , <i>P. peuce</i> , <i>P. ponderosa</i> , <i>P. radiata</i> , <i>P. sibirica</i> , <i>P. strobus</i> , <i>P. sylvestris</i> , <i>P. cembra</i> , <i>P. banksiana</i> , <i>P. contorta</i> , <i>P. densiflora</i> , <i>P. flexilis</i> , <i>P. jeffreyi</i> , <i>P. koraiensis</i> , <i>P. monticola</i> , <i>P. resinosa</i> , <i>P. rigida</i> , <i>P. strobus</i> , <i>P. sylvestris</i> , <i>P. thunbergii</i> , <i>P. wallichiana</i> | 16, 34, 28, 29, 30, 31, 32, 35, 36, 37, 38, 39, 40, 41, 42 |
| <b><i>Endomelanconium pini</i> (Corda) Petr.</b>                            | Romania                                                                                       | <i>P. mugo</i> , <i>P. sylvestris</i>                                                                                                                                                                                                                                                                                                                                                                                                                                                                                                                                                                                                                                       | 43                                                         |
| <b><i>Epicoccum nigrum</i> Link</b>                                         | France                                                                                        | <i>P. nigra</i>                                                                                                                                                                                                                                                                                                                                                                                                                                                                                                                                                                                                                                                             | 1                                                          |
| <b><i>Fusarium avenaceum</i> (Fr.) Sacc.</b>                                | France                                                                                        | <i>Pseudotsuga menziesii</i>                                                                                                                                                                                                                                                                                                                                                                                                                                                                                                                                                                                                                                                | 1                                                          |

Table S3: Common pathogens causing leaf damage on pines in European forest stands

| Pathogen name                                                       | Country of detection                          | Host species                                                                                    | References                |
|---------------------------------------------------------------------|-----------------------------------------------|-------------------------------------------------------------------------------------------------|---------------------------|
| <i>Fusarium bulbigenum</i> var. <i>blasticola</i> (Rostr.) Wollenw. | Germany                                       | <i>P. sylvestris</i>                                                                            | 14                        |
| <i>Fusarium</i> Link                                                | Slovakia                                      | <i>P. nigra</i>                                                                                 | 11                        |
| <i>Fusarium oxysporum</i> var. <i>aurantiacum</i> (Link) Wollenw.   | Germany                                       | <i>P. sylvestris</i> , <i>P. ponderosa</i>                                                      | 14                        |
| <i>Fusarium sporotrichioides</i> Sherb.                             | Slovakia                                      | <i>P. ponderosa</i>                                                                             | 44                        |
| <i>Fusarium stilboides</i> Wollenw.                                 | Germany                                       | <i>P. sylvestris</i>                                                                            | 2                         |
| <i>Gliocladium</i> Corda                                            | France                                        | <i>P. nigra</i>                                                                                 | 1                         |
| <i>Hendersonia acicola</i> Münch & Tubeuf                           | Lithuania, Romania, Spain                     | <i>P. sylvestris</i> , <i>P. mugo</i> , <i>P. halepensis</i>                                    | 45, 4, 46                 |
| <i>Herpotrichia juniperi</i> (Duby) Petr.                           | France, Germany, Russia, Spain                | <i>Pinus spp.</i> , <i>P. mugo</i>                                                              | 13, 18, 7, 46, 47         |
| <i>Hormonema</i> Lagerb. & Melin                                    | France                                        | <i>Pseudotsuga menziesii</i>                                                                    | 1                         |
| <i>Hypodermella sulcigena</i> (Link) Tubeuf                         | Russia                                        | <i>P. sylvestris</i> , <i>P. montana</i>                                                        | 8                         |
| <i>Lecanosticta acicola</i> (Thüm.) Syd.                            | France, Italy, Slovakia, Lithuania, Portugal, | <i>Pinus spp.</i> , <i>P. mugo</i> , <i>P. nigra</i> , <i>P. sylvestris</i> , <i>P. radiata</i> | 1, 48, 45, 32, 49, 11, 50 |

Table S3: Common pathogens causing leaf damage on pines in European forest stands

| Pathogen name                                   | Country of detection                        | Host species                                                                    | References             |
|-------------------------------------------------|---------------------------------------------|---------------------------------------------------------------------------------|------------------------|
|                                                 | Spain                                       |                                                                                 |                        |
| <i>Lecanosticta</i> Syd.                        | Spain                                       | <i>Pinus spp.</i>                                                               | 40                     |
| <i>Leptomelanconium asperulum</i> (Moesz) Petr. | Romania                                     | <i>P. mugo</i>                                                                  | 46                     |
| <i>Leptostroma</i> Fr.                          | France                                      | <i>P. nigra</i>                                                                 | 1                      |
| <i>Leptostroma pinastri</i> Desm.               | Spain                                       | <i>P. halepensis</i>                                                            | 4                      |
| <i>Libertella</i> Desm.                         | France                                      | <i>P. nigra</i>                                                                 | 1                      |
| <i>Lophodermella conjuncta</i> (Darker) Darker  | Romania, Spain                              | <i>Pinus spp., P. nigra</i>                                                     | 7, 46                  |
| <i>Lophodermella sulcigena</i> (Rostr.) Höhn.   | Bulgaria, Romania, Slovakia, United Kingdom | <i>P. contorta, P. halepensis, P. nigra, P. radiata, P. sylvestris, P. mugo</i> | 17, 51, 52, 46, 21, 53 |
| <i>Lophodermium</i> Chevall.                    | Bulgaria, Spain, United Kingdom             | <i>P. contorta, P. nigra, P. sylvestris, P. radiata</i>                         | 25, 54, 55, 21, 56, 57 |
| <i>Lophodermium conigenum</i> (Link) Tubeuf     | Lithuania, Romania, United Kingdom          | <i>P. mugo, P. sylvestris</i>                                                   | 58, 20, 59, 21, 56, 57 |

Table S3: Common pathogens causing leaf damage on pines in European forest stands

| Pathogen name                                                       | Country of detection                                                                                     | Host species                                                                                                                                                                                                                                                                             | References                                                  |
|---------------------------------------------------------------------|----------------------------------------------------------------------------------------------------------|------------------------------------------------------------------------------------------------------------------------------------------------------------------------------------------------------------------------------------------------------------------------------------------|-------------------------------------------------------------|
| <b><i>Lophodermium nitens</i> Darker</b>                            | Germany, Russia                                                                                          | <i>Pinus</i> spp., <i>P. albicaulis</i> , <i>P. mugo</i> , <i>P. strobus</i>                                                                                                                                                                                                             | 14, 60                                                      |
| <b><i>Lophodermium pinastri</i> (Schr.) Chev.</b>                   | Bulgaria, France, Germany, Lithuania, Romania, Russia, Slovakia, Spain, United Kingdom                   | <i>Pinus</i> spp., <i>P. sylvestris</i> , <i>P. halepensis</i> , <i>P. nigra</i> , <i>P. radiata</i> , <i>P. mugo</i> , <i>P. cembra</i> , <i>P. strobus</i> , <i>P. armandii</i> , <i>P. bungeana</i> , <i>P. contorta</i> , <i>P. flexilis</i> , <i>P. ponderosa</i> , <i>P. taeda</i> | 7,16, 17, 18, 13, 20, 61, 59, 46, 58,22, 62, 21, 56, 57, 63 |
| <b><i>Lophodermium pinicola</i> Tehon</b>                           | Germany                                                                                                  | <i>P. sylvestris</i>                                                                                                                                                                                                                                                                     | 64                                                          |
| <b><i>Lophodermium pini-mugonis</i> C.L. Hou &amp; M. Piepenbr.</b> | Germany                                                                                                  | <i>P. mugo</i>                                                                                                                                                                                                                                                                           | 65                                                          |
| <b><i>Lophodermium seditiosum</i> Minter, Staley &amp; Millar</b>   | Bulgaria, Finland, Germany, Italy, Lithuania, Portugal, Slovakia, Romania, Russia, Spain, United Kingdom | <i>Pinus</i> spp., <i>P. sylvestris</i> , <i>P. halepensis</i> , <i>P. nigra</i> , <i>P. radiata</i> , <i>P. contorta</i> , <i>P. mugo</i> , <i>P. pinaster</i> , <i>P. pinea</i> ,                                                                                                      | 7, 61, 17, 18, 61, 58, 66, 67, 23, 68, 21,56, 57            |

Table S3: Common pathogens causing leaf damage on pines in European forest stands

| Pathogen name                                                           | Country of detection                                   | Host species                                                                                                                                 | References                    |
|-------------------------------------------------------------------------|--------------------------------------------------------|----------------------------------------------------------------------------------------------------------------------------------------------|-------------------------------|
| <i>Melampsora larici-tremulae</i> Kleb.                                 | Italy                                                  | <i>P. pinea</i>                                                                                                                              | 69                            |
| <i>Melampsora pinitorqua</i> Rostr.                                     | France, Italy, Finland, Germany, Spain, United Kingdom | <i>Pinus</i> spp., <i>P. pinea</i> , <i>P. sylvestris</i>                                                                                    | 7, 14, 70, 71, 72, 73, 74, 75 |
| <i>Melampsora populnea</i> (Pers.) P. Karst.                            | Germany, Lithuania, Romania                            | <i>P. contorta</i> , <i>P. mugo</i> , <i>P. sylvestris</i> , <i>P. nigra</i> , <i>P. strobus</i> , <i>P. ponderosa</i> , <i>P. banksiana</i> | 15, 76, 77                    |
| <i>Meloderma desmazieri</i> (Duby) Darker                               | Romania                                                | <i>P. strobus</i> , <i>P. wallichiana</i>                                                                                                    | 41                            |
| <i>Neocatenulostroma germanicum</i> (Crous & U. Braun) Quaedvl. & Crous | Lithuania                                              | <i>P. mugo</i> , <i>P. sylvestris</i>                                                                                                        | 45                            |
| <i>Pestalotia</i> De Not.                                               | Slovakia                                               | <i>P. nigra</i>                                                                                                                              | 78                            |
| <i>Pestalotia funerea</i> Desm.                                         | Spain                                                  | <i>P. radiata</i>                                                                                                                            | 55                            |
| <i>Pestalotia hartigii</i> Tubeuf                                       | Spain                                                  | <i>P. radiata</i>                                                                                                                            | 55                            |
| <i>Pestalotiopsis funerea</i> (Desm.) Steyaert                          | Lithuania, Spain                                       | <i>P. mugo</i> , <i>P. sylvestris</i>                                                                                                        | 3, 7, 79                      |
| <i>Pestalotiopsis stevensonii</i> (Peck) Nag Raj                        | Spain                                                  | <i>P. halepensis</i>                                                                                                                         | 4                             |

Table S3: Common pathogens causing leaf damage on pines in European forest stands

| Pathogen name                                                    | Country of detection                                            | Host species                                                                                                                                     | References                           |
|------------------------------------------------------------------|-----------------------------------------------------------------|--------------------------------------------------------------------------------------------------------------------------------------------------|--------------------------------------|
| <i>Pestalotiopsis</i><br>Steyaert                                | France                                                          | <i>P. nigra</i>                                                                                                                                  | 1                                    |
| <i>Phacidium infestans</i><br>P. Karst.                          | Finland,<br>Germany,<br>Lithuania,<br>RussiaF                   | <i>Pinus</i> spp., <i>P. cembra</i> , <i>P. sylvestris</i>                                                                                       | 18, 58, 66, 80                       |
| <i>Phacidium lacerum</i> Fr.                                     | Germany                                                         | <i>P. sylvestris</i>                                                                                                                             | 81                                   |
| <i>Phoma</i> Sacc.                                               | France                                                          | <i>P. nigra</i>                                                                                                                                  | 1                                    |
| <i>Phomopsis</i> (Sacc.)<br>Sacc.                                | France,<br>Slovakia,<br>Spain                                   | <i>Pseudotsuga menziesii</i> , <i>P. halepensis</i> , <i>P. nigra</i>                                                                            | 1, 4, 6                              |
| <i>Rhizosphaera</i><br><i>kalkhoffii</i> Bubák                   | Spain                                                           | <i>Pinus</i> spp.                                                                                                                                | 7                                    |
| <i>Rhizosphaera pini</i><br>(Corda) Maubl.                       | Lithuania                                                       | <i>P. mugo</i>                                                                                                                                   | 20                                   |
| <i>Sclerophoma</i><br><i>magnusiana</i> M.<br>Wilson & G.G. Hahn | Germany                                                         | <i>P. sylvestris</i>                                                                                                                             | 82                                   |
| <i>Sclerophoma</i><br><i>pithyophila</i> (Corda)<br>Höhn.        | Bulgaria,<br>France,<br>Germany,<br>Spain,<br>United<br>Kingdom | <i>P. contorta</i> , <i>P. halepensis</i> , <i>P. nigra</i> , <i>P. pinaster</i> , <i>P. radiata</i> , <i>P. sylvestris</i> , <i>P. uncinata</i> | 4, 7, 13, 22, 22, 83, 84, 79, 85, 86 |
| <i>Sclerotinia</i><br><i>graminearum</i> Elenev<br>ex Solkina    | Russia                                                          | <i>P. sylvestris</i>                                                                                                                             | 8                                    |



Table S3: Common pathogens causing leaf damage on pines in European forest stands

| Pathogen name                                                       | Country of detection          | Host species                                                                                           | References    |
|---------------------------------------------------------------------|-------------------------------|--------------------------------------------------------------------------------------------------------|---------------|
| <b><i>Sirococcus conigenus</i> (Pers.) P.F. Cannon &amp; Minter</b> | Spain                         | <i>Pinus</i> spp.                                                                                      | 7             |
| <b><i>Sirococcus strobilinus</i> Preuss</b>                         | France, Spain, United Kingdom | <i>P. nigra</i> , <i>P. pinaster</i> , <i>P. sylvestris</i> , <i>P. uncinata</i> , <i>P. contorta</i>  | 1, 39, 77, 73 |
| <b><i>Sordaria macrospora</i> Auersw.</b>                           | Slovakia                      | <i>P. nigra</i>                                                                                        | 87            |
| <b><i>Sydowia polyspora</i> (Bref. &amp; Tavel) E. Müll.</b>        | Lithuania                     | <i>P. mugo</i>                                                                                         | 88            |
| <b><i>Thyriopsis halepensis</i> (Cooke) Theiss. &amp; Syd.</b>      | Spain, Portugal               | <i>P. halepensis</i> , <i>P. pinaster</i> , <i>P. pinea</i>                                            | 4, 89         |
| <b><i>Thyriopsis halepensis</i> (Cooke) Theiss. &amp; Syd.</b>      | France, Spain, Portugal       | <i>Pinus</i> spp., <i>P. halepensis</i> , <i>P. pinea</i> , <i>P. pinaster</i> , <i>P. canariensis</i> | 4, 7, 89, 90  |
| <b><i>Trichothecium roseum</i> (Pers.) Link</b>                     | Slovakia                      | <i>Pinus</i> spp.                                                                                      | 6             |
| <b><i>Truncatella hartigii</i> (Tubef) Steyaert</b>                 | Spain                         | <i>Pinus</i> spp.                                                                                      | 7             |
| <b><i>Typhula Ishikariensis</i> S. Imai</b>                         | Russia                        | <i>P. sylvestris</i>                                                                                   | 91            |

Table S3: Common pathogens causing leaf damage on pines in European forest stands

## References

1. Iloos, R.; Fabre, B.; Saurat, C.; Fourrier, C.; Frey, P.; Marçais, B., Development, Comparison, and Validation of Real-Time and Conventional PCR Tools for the Detection of the Fungal Pathogens Causing Brown Spot and Red Band Needle Blights of Pine. *Phytopathology* **2009**, *100* (1), 105-114.
2. Tokumasu, S.; Aoki, T.; Oberwinkler, F., Fungal succession on pine needles in Germany. *Mycoscience* **1994**, *35* (1), 29-37.
3. Martínez-Alvarez, P.; Rodríguez-Ceinos, S.; Martín-García, J.; Diez, J., Monitoring endophyte populations in pine plantations and native oak forests in Northern Spain. *Forest Systems* **2012**, *21* (3), 373-382.
4. Botella, L.; Santamaría, O.; Diez, J., Fungi associated with the decline of *Pinus halepensis* in Spain. *Fungal Diversity* **2010**, *40* (1), 1-11.
5. Álvarez, G.; Fernández, M.; Casero, J. J. D., Ophiostomatoid fungi associated with declined *Pinus pinaster* stands in Spain. *Forest systems* **2015**, *24* (1), 6.
6. Ivanova, H., Fungi associated with a decline of *Pinus nigra* in urban greenery. *Acta Fytotechnica et Zootechnica* **2015**, *18* (2), 36-43.
7. Muñoz López, C.; Pérez Fortea, V.; Cobos Swarez, P.; Hernández Alonso, R.; Sánchez Peña, G., Sanidad Forestal: Guía en imágenes de plagas, enfermedades y otros agentes presentes en los bosques. **2007**.
8. Kuz'michev, E. P.; Sokolova, E. S.; Mozolevskaya, E. G., *Diseases of woody plants. Reference book. (Diseases and pests in forests of Russia. Vol. 1)*. VNIILM, Moscow: 2004; p 120.
9. Petrescu, M., Aspecte fitopatologice din padurile din RS Romania. *Bucuregti, Edit. agro-silvic6* **1966**.
10. Martínez-Álvarez, P.; Alves-Santos, F. M.; Diez, J. J., In vitro and in vivo interactions between *Trichoderma viride* and *Fusarium circinatum*. *Silva Fennica* **2012**, *46* (3), 303-316.
11. Ivanová, H.; Bernadovičová, S., Species diversity of microscopic fungi on Austrian pines growing in urban greenery of Nitra town. *Folia Oecologica* **2010**, *37* (2), 168.
12. Ivanová, H., Morphological features of *Camarosporium pini*—the fungus associated to health state degradation in Austrian and Ponderosa pine. *Folia Oecologica* **2017**, *44* (1), 54-57.
13. Schmid-Heckel, H., *Zur Kenntnis der Pilze in den Nördlichen Kalkalpen: mykologische Untersuchungen im Nationalpark Berchtesgaden*. Nationalpark Berchtesgaden: 1985; Vol. 8.
14. Spaulding, P., Foreign diseases of forest trees of the world. An annotated list. *U.S.D.A. Agric. Handb* **1961**, *197*, 1-361.
15. Minkevicius, A.; Ignataviciute, M., *Lietuvos grybai. V*, V. Vilnius, 1991.
16. Pastirčáková, K.; Ivanová, H.; Pastirčák, M., Druhová diverzita húb na boroviciach (*Pinus* spp.) v mestskej a mimomestskej vegetácii [Species diversity of fungi on pines spp. in urban and suburban greenery]. *Dendrologické dni v Arboréte Mlyňany SAV* **2014**, 150-157.
17. Dobрева, M.; Georgieva, M.; Dermendzhiev, P.; Nachev, R.; Velinov, V.; Georgiev, G., Fungal pathogens associated with *Pinus* species in the region of Forest Protection Station Plovdiv in the period 2013-2016. *Forest Science* **2016**, *16* (1-2), 103-116.
18. Kuz'michev, E. P.; Kulikova, E. G., Common fungal diseases of Russian forests. *Gen. Tech. Rep. NE-279. Newtown Square, PA; US Department of Agriculture, Forest Service, Northeastern Research Station*. 137p. **2001**, 279.
19. Fuss, M., *Systematische aufzählung der in Siebenbürgen angegebenen cryptogamen*. 1877; Vol. 14.
20. Kutorga, E.; Adamonytė, G.; Iršėnaitė, R.; Kasparavičius, J.; Markovskaja, S.; Motiejūnaitė, J.; Treigienė, A., A checklist of mycobiota recorded in burnt and unburnt *Pinus mugo* plantations in the Curonian Spit (Lithuania). *Botanica Lithuanica* **2012**, *18* (1), 66-79.
21. Strouts, R. G.; Winter, T. G., *Diagnosis of ill-health in trees. Second edition*. HMSO: 2000.
22. Rosnev, B.; BAS, S. B.; Mirchev, P.; BAS, S. B.; Petkov, P.; BAS, S. B.; Georgiev, G.; BAS, S. B.; Tsankov, G.; BAS, S. B., Changes in the Health Condition of the Scots Pine (*Pinus sylvestris* L.) Plantations in Southwestern Bulgaria during the Period 1986-2005. *Plant Science (Bulgaria)* **2008**.

Table S3: Common pathogens causing leaf damage on pines in European forest stands

23. Hâruța, O.; Fodor, E.; Teușdea, A., Complex diseases in *Pinus nigra* Arnold situated along Crișul Repede River Gorge. *Analele Institutul de Cercetări și Amenajări Silvice* **2007**, 50, 169-184.
24. Bragança, H.; Inácio, M. L.; Diogo, E., Detection Of Pine Needle Diseases In Portugal. In *Cost Action Fp1102 – DIAROD Annual Workshop*, Aberdeen, UK, 2012.
25. Rossnev, B.; Petkov, P.; Georgieva, M., Monitoring on health status of *Pinus nigra* Arn. plantations in middle and east Stara Planina. *Nauka za Gorata* **2008**, 45 (2), 3-14.
26. Georgieva, M. I.; Hlebarska, S., A review of *Sphaeropsis sapinea* occurrence on *Pinus* species in Bulgaria. *Journal of BioScience and Biotechnology* **2016**, 5 (3), 247-250.
27. Georgiev, G.; Georgieva, M.; Mirchev, P.; Zhiyanski, M., Main insect pests and fungal pathogens on tree and shrub vegetation in urban ecosystems. *Hlorind Ltd., Sofia* **2017**.
28. Fabre, B.; Ios, R.; Piou, D.; Marçais, B., Is the Emergence of Dothistroma Needle Blight of Pine in France Caused by the Cryptic Species *Dothistroma pini*? *Phytopathology* **2011**, 102 (1), 47-54.
29. Ondrušková, E.; Hečková, Z.; Horáková, M. K.; Koltay, A.; Ostrovský, R.; Pažitný, J.; Adamčíková, K., Distribution and characterization of *Dothistroma* needle blight pathogens on *Pinus mugo* in Slovakia. *European Journal of Plant Pathology* **2017**, 148 (2), 283-294.
30. Jánošíková-Hečková, Z.; Ondrušková, E.; Barta, M.; Ostrovský, R.; Kádasi-Horáková, M.; Pastirčáková, K.; Kobza, M.; Adamčíková, K., The hosts and geographic range of *Dothistroma* needle blight in Slovakia. *Forest pathology* **2018**, 48 (3), e12421.
31. Barnes, I.; Van der Nest, A.; Mullett, M.; Crous, P.; Drenkhan, R.; Musolin, D.; Wingfield, M., Neotypification of *Dothistroma septosporum* and epitypification of *D. pini*, causal agents of *Dothistroma* needle blight of pine. *Forest pathology* **2016**, 46 (5), 388-407.
32. Ortíz de Urbina, E.; Mesanza, N.; Aragonés, A.; Raposo, R.; Elvira-Recuenco, M.; Boqué, R.; Patten, C.; Aitken, J.; Iturriza, E., Emerging needle blight diseases in Atlantic *Pinus* ecosystems of Spain. *Forests* **2016**, 8 (1), 18.
33. Cobos-Suarez, J.; Ruiz-Urrestarazu, M., Problemas fitosanitarios de la especie *Pinus radiata* D. Don en España, con especial referencia al País Vasco. *Castilla* **1990**, 2, 1.
34. Drenkhan, R.; Tomešová-Haataja, V.; Fraser, S.; Bradshaw, R.; Vahalík, P.; Mullett, M.; Martín-García, J.; Bulman, L.; Wingfield, M.; Kirisits, T., Global geographic distribution and host range of *Dothistroma* species: a comprehensive review. *Forest Pathology* **2016**, 46 (5), 408-442.
35. Markovskaja, S.; Treigienė, A., New data on invasive pathogenic fungus *Dothistroma septosporum* in Lithuania. *Botanica Lithuanica* **2009**, 15 (1).
36. Müller, M.; Hantula, J.; Vuorinen, M., First observations of *Mycosphaerella pini* on Scots pine in Finland. *Plant disease* **2009**, 93 (3), 322-322.
37. Butin, H.; Kehr, R.; Pehl, L., *Dothistroma rhabdoclinis* sp. nov. associated with *Rhabdocline pseudotsugae* on Douglas fir. *Forest Pathology* **2000**, 30 (4), 195-203.
38. Barnes, I.; Kirisits, T.; Akulov, A.; Chhetri, D.; Wingfield, B. D.; Bulgakov, T.; Wingfield, M. J., New host and country records of the *Dothistroma* needle blight pathogens from Europe and Asia. *Forest Pathology* **2008**, 38 (3), 178-195.
39. Zamora, P.; Martínez-Ruiz, C.; Díez, J., Fungi in needles and twigs of pine plantations from northern Spain. *Fungal Divers* **2008**, 30, 171-184.
40. Iturriza, E.; Mesanza, N.; Brenning, A., Spatial analysis of the risk of major forest diseases in Monterey pine plantations. *Plant Pathology* **2014**, 64 (4), 880-889.
41. Georgescu, C., *Bolile și daunătorii padurilor: Biologie și combatere*. Ed. Agro-Silvica de Stat: 1957.
42. Mullett, M.; Brown, A.; Fraser, S.; Baden, R.; Tubby, K., Insights into the pathways of spread and potential origins of *Dothistroma septosporum* in Britain. *Fungal Ecology* **2017**, 26, 85-98.
43. Richiteanu, A., Studiul micromicetelor din masivul Iezer-Papusa. *Microbiol* **1971**.
44. Helena, I.; Ľudmila, H.; Peter, P., First Confirmed Report on *Fusarium sporotrichioides* on *Pinus ponderosa* var. *jeffreyi* in Slovakia. *Plant Protection Science* **2016**, 52 (4), 250-253.
45. Markovskaja, S.; Kačergius, A.; Davydenko, K.; Fraser, S., First record of *Neocatenulostroma germanicum* on pines in Lithuania and Ukraine and its co-occurrence with *Dothistroma* spp. and other pathogens. *Forest pathology* **2016**, 46 (5), 522-533.

Table S3: Common pathogens causing leaf damage on pines in European forest stands

46. György, A. T.; D., C., Boli foliare la specii de pin. *Revista de Silvicultura* **2000**, 1-2 (11-12), 85-88.
47. Cantegrel, R., Les Pins de montagne (*Pinus uncinata* Ram, *P. mughus* Scop., et consorts) du Jura aux Préalpes orientales en passant par la Lorraine et la Bohême. *Revue Forestière Française* **2017**.
48. Markovskaja, S.; Kačergius, A.; Treigienė, A., Occurrence of new alien pathogenic fungus *Mycosphaerella dearnessii* in Lithuania. *Botanica Lithuanica* **2011**, 17 (1), 29-37.
49. La Porta, N.; Capretti, P., *Mycosphaerella dearnessii*, a needle-cast pathogen on mountain pine (*Pinus mugo*) in Italy. *Plant disease* **2000**, 84 (8), 922-922.
50. Melgarejo Nardiz, P.; García Jimenez, J.; Jorda Gutierrez, M.; Lopez Gonzalez, M.; Yebes, M.; Durán Vila, N., *Patógenos de Plantas descritos en España*. 2010.
51. Kunca, A.; Findo, S.; Galko, J.; Gubka, A.; Kaštier, P.; Konôpka, B.; Konôpka, J.; Leontovyč, R.; Longauerová, V.; Nikolov, C., Problémy ochrany lesa v roku 2011 a prognóza na rok 2012. *Aktuálne problémy v ochrane lesa* **2012**, 5-11.
52. Petkov, P.; Rosnev, B., *Lophodermella sulsigena* (Restrup) Höhnelt – a fungal disease on *Pinus sylvestris* L. needles in Bulgaria. *Gora* **2007**, 7 (19-20).
53. Mitchell, C.; Millar, C.; Haworth, M., Effect of the needle-cast fungus *Lophodermella sulcigena* on growth of Corsican pine. *Forestry: An International Journal of Forest Research* **1976**, 49 (2), 153-158.
54. Petkov, P., Comparative studies of the resistance of scots pine (*Pinus sylvestris* L.) provenances to *Lophodermium pinastri* (Schrad.) Chev. complex in some regions of the country. *Forest Science* **1993**, 3, 63-68.
55. Vázquez, J. M.; R Pérez Otero, P., Hongos de las acículas de *Pinus* spp. en las masas forestales gallegas. In *Congresos Forestales*, 1997.
56. Minter, D.; Staley, J.; Millar, C., Four species of *Lophodermium* on *Pinus sylvestris*. *Transactions of the British Mycological Society* **1978**, 71 (2), 295-301.
57. Reignoux, S. N.; Green, S.; Ennos, R. A., Molecular identification and relative abundance of cryptic *Lophodermium* species in natural populations of Scots pine, *Pinus sylvestris* L. *Fungal biology* **2014**, 118 (9-10), 835-845.
58. Vasilias, A.; Dabkevičius, Z.; Žiogas, A., Miško fitopatologija:[vadovėlis]/Zenonas Dabkevičius, Albertas Vasilias, Algimantas Žiogas:[sudarytojas ir atsakingasis redaktorius Algimantas Žiogas]; Lietuvos Respublikos aplinkos ministerija, Lietuvos žemės ūkio universitetas. **2006**.
59. Kutorga, E.; Irsenaite, R.; Iznova, T.; Kasparavicius, J.; Markovskaja, S.; Motiejunaite, J., Species diversity and composition of fungal communities in a Scots pine forest affected by the great cormorant colony. *Acta Mycologica* **2013**, 48 (2).
60. Zhukov, A. M.; Gninenko, Y. I.; Zhukov, P. D., *Dangerous and Poorly Studied Diseases of Coniferous Trees in Forests of Russia*. Second edition ed.; Pushkino: Moscow, 2013; p 128.
61. Rosnev, B.; Petkov, P., Health status of the Scots pine (*Pinus sylvestris* L.) in representative stands in the Rila mountain. *Forest Science* **1997**, 2, 66-70.
62. Sieber, T. N.; Rys, J.; Holdenrieder, O., Mycobiota in symptomless needles of *Pinus mugo* ssp. *uncinata*. *Mycological research* **1999**, 103 (3), 306-310.
63. Lanier, L.; Leroy, P.; Tomassone, R., Contribution à l'étude du «rouge cryptogamique» des Pins dû à *Lophodermium pinastri* (Schrad.) Chev. *Revue Forestière Française* **1965**.
64. FAO/IUFRO, *Diseases of widely planted forest trees*. U.S. Dept. of Agriculture, Forest Service: [Washington, 1964; p 237 p.
65. Hou, C.-L.; Li, L.; Piepenbring, M., *Lophodermium pini-mugonis* sp. nov. on needles of *Pinus mugo* from the Alps based on morphological and molecular data. *Mycol Progress* **2009**, 8 (1), 29.
66. Lilja, A.; Poteri, M.; Petäistö, R.-L.; Rikala, R.; Kurkela, T.; Kananen, R., Fungal diseases in forest nurseries in Finland. **2010**.
67. Ortiz-García, S.; Gernandt, D. S.; Stone, J. K.; Johnston, P. R.; Chapela, I. H.; Salas-Lizana, R.; Alvarez-Buylla, E. R., Phylogenetics of *Lophodermium* from pine. *Mycologia* **2003**, 95 (5), 846-859.

Table S3: Common pathogens causing leaf damage on pines in European forest stands

68. Tegli, S.; Comparini, C.; Moriondo, F., Needle cast disease on *Pinus* spp. by *Lophodermium seditiosum* (Arrossamento degli aghi di *Pinus* spp. da *Lophodermium seditiosum*). *Micologia Italiana* **1993**, 3, 57-63.
69. Longo, N.; Naldini, B.; Paolillo, A.; Drovandi, F.; Tani, G.; Gonnelli, T., Morphological aspects of early host-parasite interactions in infections of *Melampsora pinitorqua* and *Melampsora larici-tremulae* on *Pinus sylvestris*. Implications in the taxonomical relationship of the two rust fungi. *Caryologia* **1997**, 50 (1), 35-57.
70. Longo, N.; Longo, B. N., Observations on the fine structure of the haustorium of *Melampsora pinitorqua* (A. Br.) Rostr. in cells of *Pinus pinea* L. *Caryologia* **1975**, 28 (3), 389-405.
71. Longo, N.; Moriondo, F.; Longo, B. N., Ultrastructural observations on the host-pathogen interface in infections of *Cronartium flaccidum* on pine. *Caryologia* **1982**, 35 (3), 307-326.
72. Kurkela, T., Release and germination of basidiospores of *Melampsora pinitorqua* (Braun) Rostr. and *M. larici-tremulae* Kleb. at various temperatures. *Metsantutkimuslaitoksen Julkaisuja* **1973**, 78 (5).
73. Phillips, D. H.; Burdekin, D. A., *Diseases of forest and ornamental trees*. Springer: 1992.
74. Peace, T., The occurrence of *Melampsora pinitorqua* on Scots pine in South-eastern England. *Forestry: An International Journal of Forest Research* **1944**, 18 (1), 47-48.
75. Desprez-Loustau, M.-L., Caractérisation morphologique et biologique des *Melampsora* spp. pathogènes des pins en Europe. *European Journal of Forest Pathology* **1986**, 16 (5-6), 360-374.
76. Braun, U., Die Rostpilze (Uredinales) der Deutschen Demokratischen Republik. *Feddes Repertorium* **1982**, 93 (3-4), 213-333.
77. Dițu, I.; Pătrășcoiu, M.; E., S.; P., S., Cercetări asupra ruginii produsă de *Melampsora pinitorqua* (A.Br.) Rostr. la pin. *Anale ICAS* **1974**, 30 (1), 7-34.
78. Juhasova, G.; Adamcikova, K.; Kobza, M., Sphaeropsis tip blight disease of Austrian pine in urban greenery. *Hortic. Sci* **2006**, 33, 11-15.
79. Papazova-Anakieva, I.; Naceski, S., Important plant pathogens in nurseries for production of forest and ornamental plants in R. Macedonia. *Plant Protection* **2012**, 23, 83-91.
80. Gernandt, D. S.; Camacho, F. J.; Stone, J. K., *Meria laricis*, an anamorph of *Rhabdocline*. *Mycologia* **1997**, 89 (5), 735-744.
81. Crous, P. W.; Quaedvlieg, W.; Hansen, K.; Hawksworth, D. L.; Groenewald, J. Z., *Phacidium* and *Ceuthospora* (Phacidiaceae) are congeneric: taxonomic and nomenclatural implications. *IMA fungus* **2014**, 5 (2), 173-193.
82. Wilson, M.; Hahn, G. G., The identity of *Phoma pitya* Sacc., *Phoma abietina* Hart. and their relation to *Phomopsis Pseudotsugae* Wilson. *Transactions of the British Mycological Society* **1928**, 13 (3-4), 261-IN24.
83. Rack, K.; Schneidemann, U., Succession and pathogenic properties of fungi inhabiting pine needles. *European Journal of Forest Pathology* **1987**.
84. Santamaria, O.; Tejerina, L.; Pajares, J.; Diez, J., Effects of associated fungi *Sclerophoma pythiophila* and *Cenangium ferruginosum* on *Gremmeniella abietina* dieback in Spain. *Forest Pathology* **2007**, 37 (2), 121-128.
85. Batko, S.; Murray, J.; Peace, T., *Sclerophoma pithyophila* associated with needle-cast of pines and its connexion with *Pullularia pullulans*. *Transactions of the British Mycological Society* **1958**, 41 (1), 126-IN9.
86. Piou, D.; Chandelier, P.; Morelet, M., *Sphaeropsis sapinea*, un nouveau problème sanitaire des Pins en France? *Revue Forestiere Francaise* **1991**.
87. Ivanova, H.; Pristaš, P.; Ondrušková, E., Comparison of two *Coniochaeta* species (*C. ligniaria* and *C. malacotricha*) with a new pathogen of black pine needles—*Sordaria macrospora*. *Plant Protection Science* **2015**, 52 (1), 18-25.
88. Lygis, V.; Vasiliauskaite, I.; Matelis, A.; Pliūra, A.; Vasaitis, R., Fungi in living and dead stems and stumps of *Pinus mugo* on coastal dunes of the Baltic Sea. *Plant Protection Science* **2014**, 50 (4), 221-226.

Table S3: Common pathogens causing leaf damage on pines in European forest stands

89. Branco, M.; Bragança, H.; Sousa, E.; Phillips, A. J., Pests and diseases in Portuguese forestry: current and new threats. In *Forest context and policies in Portugal*, Springer: 2014; pp 117-154.
90. Boutte, B.; Daubree, J.-B., Un pathogène foliaire discret *Thyriopsis halepensis* s'attaque aux pins pignons en Languedoc-Roussillon. *Forêt méditerranéenne* **2016**.
91. Hoshino, T.; Tkachenko, O.; Kiriaki, M.; Yumoto, I.; Matsumoto, N., Winter damage caused by *Typhula ishkariensis* biological species I on conifer seedlings and hop roots collected in the Volga–Ural regions of Russia. *Canadian Journal of Plant Pathology* **2004**, 26, 391-396.
