# Supplementary material
Source: MDPI journal article supplement (https://www.mdpi.com/1999-4907/11/1/7)
Supplement: s1 [file s1]

Table S5. Common pathogens causing damages on pines in European nurseries

| Disease name/type                                     | Pathogen name                                                                                                                                                                                                                                               | Host Plant species*                                                                                                                                                                                                                                                                                                         | Country of detection**                                                                                      | References                                             |
|-------------------------------------------------------|-------------------------------------------------------------------------------------------------------------------------------------------------------------------------------------------------------------------------------------------------------------|-----------------------------------------------------------------------------------------------------------------------------------------------------------------------------------------------------------------------------------------------------------------------------------------------------------------------------|-------------------------------------------------------------------------------------------------------------|--------------------------------------------------------|
| Pine Pitch Canker Disease                             | <i>Fusarium circinatum</i>                                                                                                                                                                                                                                  | <i>Pinus elliotii</i> , <i>P. echinata</i> , <i>P. muricata</i> <i>P. palustris</i> , <i>P. radiata</i> , <i>P. tuberculata</i>                                                                                                                                                                                             | Canada, USA                                                                                                 | 1, 2                                                   |
|                                                       |                                                                                                                                                                                                                                                             | <i>Pinus maximinoi</i> , <i>P. patula</i> , <i>P. tecunumanii</i>                                                                                                                                                                                                                                                           | Colombia                                                                                                    | 3                                                      |
|                                                       |                                                                                                                                                                                                                                                             | <i>Pinus patula</i>                                                                                                                                                                                                                                                                                                         | South Africa                                                                                                | 4, 5                                                   |
|                                                       |                                                                                                                                                                                                                                                             | <i>Pinus pinaster</i> , <i>P. radiata</i>                                                                                                                                                                                                                                                                                   | Portugal, Spain                                                                                             | 6, 7                                                   |
|                                                       |                                                                                                                                                                                                                                                             | <i>Pinus taeda</i>                                                                                                                                                                                                                                                                                                          | Brazil, Uruguay                                                                                             | 8, 9                                                   |
|                                                       |                                                                                                                                                                                                                                                             | <i>Pinus radiata</i>                                                                                                                                                                                                                                                                                                        | France, Chile                                                                                               | 10,11                                                  |
| Other nursery diseases caused by <i>Fusarium</i> spp. | <i>Fusarium oxysporum</i> , <i>F. solani</i> , <i>Fusarium</i> sp., <i>F. stilboides</i> , <i>F. verticillioide</i>                                                                                                                                         | <i>Pinus canariensis</i> , <i>P. eldarica</i> , <i>P. halepensis</i> , <i>P. nigra</i> , <i>P. pinaster</i> , <i>P. pinea</i> , <i>P. radiata</i> , <i>P. sylvestris</i>                                                                                                                                                    | Bulgaria, Denmark, Germany, Lithuania, Macedonia, Portugal, Romania, Russia, Spain, Sweden, Turkey, Ukraine | 12, 13, 14, 15, 16, 17, 18, 19, 20, 21, 22, 23, 24, 25 |
| Cylindrocarpon Root Decay                             | <i>Cylindrocarpon</i> sp., <i>C. cylindroides</i> , <i>C. destructans</i> , <i>C. didymum</i> , <i>C. tenue</i>                                                                                                                                             | <i>Pinus eldarica</i> , <i>P. halepensis</i> , <i>P. pinaster</i> , <i>P. pinea</i> , <i>P. sylvestris</i>                                                                                                                                                                                                                  | Portugal, Russia, Spain, Sweden                                                                             | 26, 27, 23, 28, 29                                     |
| Charcoal root rot and Black root rot                  | <i>Macrophomina phaseolina</i>                                                                                                                                                                                                                              | <i>Pinus pinaster</i>                                                                                                                                                                                                                                                                                                       | Israel, Portugal, Turkey                                                                                    | 30, 31, 32                                             |
| Phytophthora Damping-off and Root Rot                 | <i>P. cinamomi</i> , <i>P. cactorum</i> , <i>P. P. citricola sensu lato</i> , <i>P. citrophthora</i> , <i>P. crassamura</i> , <i>P. cryptogea</i> , <i>P. drechsleri</i> , <i>P. nicotianae</i> , <i>P. plurivora</i> , <i>P. pini</i> , <i>P. syringae</i> | <i>Pinus brutia</i> , <i>P. eliottii</i> , <i>P. halepensis</i> , <i>P. mugo</i> , <i>P. muricata</i> , <i>P. nigra</i> , <i>P. peuce</i> , <i>P. pinaster</i> , <i>P. pinea</i> , <i>P. radiata</i> , <i>P. strobus</i> , <i>P. sylvestris</i> , <i>P. wallichiana</i> , <i>Pseudotsuga menziesii</i> , <i>Picea abies</i> | Croatia, France, Germany, Hungary, Italy, Lithuania, Poland, Russia, Spain, Turkey                          | 33, 34, 35, 36, 37                                     |
| Pythium Root Rot                                      | <i>Pythium aphanidermatum</i> , <i>P. intermedium</i> , <i>P. irregulare</i> , <i>Pythium</i> sp., <i>P. ultimum</i> , <i>Phytopyhtium vexans</i>                                                                                                           | <i>Pinus butia</i> , <i>P. halepensis</i> , <i>P. nigra</i> , <i>P. nigra</i> subsp. <i>pallasiana</i> , <i>P. pinaster</i> , <i>P. pinea</i> , <i>P. radiata</i> , <i>Pinus</i> spp., <i>P. sylvestris</i>                                                                                                                 | Denmark, Portugal, Romania, Russia, Sweden, Turkey, Ukraine                                                 | 14, 17, 18, 38, 23, 37, 39                             |
| Rhizoctonia Blight                                    | <i>Rhizoctonia solani</i> , <i>Rhizoctonia</i> sp. (teleomorph, <i>Thanatephorus</i> or <i>Ceratobasidium</i> )                                                                                                                                             | <i>Pinus nigra</i> , <i>P. nigra</i> subsp. <i>pallasiana</i> , <i>P. pinaster</i> , <i>P. pinea</i> , <i>P. sylvestris</i>                                                                                                                                                                                                 | Bulgaria, Finland, Macedonia, Poland, Portugal, Turkey, Ukraine                                             | 13, 40, 41, 42,43, 17, 24, 25                          |
| Brown spot needle blight                              | <i>Lecanosticta acicola</i> ( <i>Mycosphaerella dearnessii</i> )                                                                                                                                                                                            | <i>Pinus banksiana</i> , <i>P. echinata</i> , <i>P. glabra</i> , <i>P. halepensis</i> , <i>Pinus mugo</i> , <i>P. palustris</i> ., <i>P. palustris</i> x <i>P. taeda</i> , <i>P. pithyusa</i> , <i>P. ponderosa</i> , <i>P. pumila</i> , <i>P. rigida</i> , <i>P. serótina</i> , <i>P.</i>                                  | Worldwide                                                                                                   | 44, 45, 46                                             |

Table S5. Common pathogens causing damages on pines in European nurseries

*strobis, P. sylvestris, P. taeda, P. virginiana*

| Disease name/type                                                | Pathogen name                                                                          | Host Plant species*                                                                                                                                                                                                                                  | Country of detection**                                                                                                | References                                                         |
|------------------------------------------------------------------|----------------------------------------------------------------------------------------|------------------------------------------------------------------------------------------------------------------------------------------------------------------------------------------------------------------------------------------------------|-----------------------------------------------------------------------------------------------------------------------|--------------------------------------------------------------------|
| Dothistroma Needle Blight                                        | <i>Dothistroma septosporum</i> ( <i>Mycosphaerella pini</i> ), <i>D. pini</i>          | <i>Pinus aristata, P. attenuata, P. brutia, P. cembra, P. contorta, P. coulteri, P. densifolia, P. flexilis, P. jeffreyi, P. mugo, P. muricata, P. nigra</i> subsp. <i>laricio, P. pinaster, P. ponderosa, P. radiata, P. sylvestris, Pinus spp.</i> | Worldwide<br>Lithuania, Sweden, Ukraine                                                                               | 47, 48, 49, 50, 51, 52                                             |
| Needle blight                                                    | <i>Neocatenulostroma germanicum</i> ( <i>Catenulostroma germanicum</i> )               | <i>Pinus mugo, P. sylvestris, P. sylvestris</i> subsp. <i>pallasiana</i>                                                                                                                                                                             | Lithuania, Ukraine                                                                                                    | 52                                                                 |
| Sphaeropsis blight, Diplodia Shoot Blight, Canker and Collar Rot | <i>Sphaeropsis sapinea</i> ( <i>Diplodia sapinea, D.pinea</i> )                        | <i>Pinus halepensis, P. leucoderma, P. mugo, P. nigra P. nigra</i> subsp. <i>laricio, P. pinaster, P.pinea, P. radiata, P. sylvestris</i>                                                                                                            | Worldwide<br>Estonia, Greece, Italy, Lithuania, Portugal, Slovak republic, Spain, Ukraine                             | 53, 54, 55, 56, 57, 58, 26, 31, 59, 60, 39                         |
| NeedleCast                                                       | <i>Naemacyclus minor</i> ( <i>Cyclaneusma minus</i> )                                  | <i>Pinus mugo, P. nigra, P. ponderosa, Pinus sp., P. strobis, P. sylvestris</i>                                                                                                                                                                      | Worldwide                                                                                                             | 61, 62                                                             |
|                                                                  | <i>Lophodermium conigenum, L. pinastri, L. seditiosum, Lophodermium sp.</i>            | <i>Pinus halepensis, P. nigra, P. nigra</i> subsp. <i>laricio, P. pinaster, P. pinea, P. radiata, Pinus sp., P. sylvestris</i>                                                                                                                       | Worldwide<br>Bulgaria, Estonia, Finland, Macedonia, Poland, Portugal, Romania, Russia, Slovenia , Sweden, UK, Ukraine | 63, 64, 65, 40, 41, 66, 67, 68, 17, 26, 69, 70, 71, 72, 73, 74, 25 |
|                                                                  | <i>Lophodermella sulcigena</i> ( <i>Hypodermella sulcigena</i> )                       | <i>Pinus montana, P. sylvestris</i>                                                                                                                                                                                                                  | Russia                                                                                                                | 73                                                                 |
|                                                                  | <i>Rhizosphaera kalkhoffii</i>                                                         | <i>Picea spp, Pinus mugo, P. nigra, P. strobis, Pinus sylvestris</i>                                                                                                                                                                                 | Ukraine                                                                                                               | 39                                                                 |
|                                                                  | <i>Pestalotia hartigii, Pestalotia sp., Pestalotiopsis funerea, Pestalotiopsis sp.</i> | <i>Pinus halepensis, P. mugo, P. pinaster, P. pinea, Pinus spp., P. sylvestris</i>                                                                                                                                                                   | Macedonia, Portugal, Spain, Ukraine                                                                                   | 41, 26, 75, 39                                                     |
| Phoma Blight                                                     | <i>Phoma macrostoma, Phoma pini, Phoma sp.</i>                                         | <i>Pinus eldarica, P. pinaster, P-sylvestris</i>                                                                                                                                                                                                     | Ukraine, Spain, Turkey                                                                                                | 22, 75, 24, 25                                                     |
| Scleroderris Canker (Brunchorstia disease)                       | <i>Gremmeniella abietina</i>                                                           | <i>Pinus contorta, Pinus spp., Pinus sylvestris</i>                                                                                                                                                                                                  | Worldwide<br>Estonia, Finland, Poland, Russia, Spain, Sweden                                                          | 76, 77, 78, 79, 80, 81, 27, 82, 83, 84                             |

Table S5. Common pathogens causing damages on pines in European nurseries

| Sirococcus Shoot Blight                                                                                                      |                   | <i>Sirococcus conigenus</i><br>(= <i>Sirococcus stobilinus</i> )                                                                                                                                                                                                                                                                                                                                                                                                                                                                                                                                                                                                                                                                                                                                                                                                                                                                                                                                   | <i>Pinus contorta</i> , <i>P. halepensis</i> , <i>P. nigra</i> var. <i>maritima</i> , <i>Pinus</i> spp., <i>P. sylvestris</i>                                                                                                  | Spain, Sweden, UK                                                                                                                                                           | 85, 86, 74                                                                                                                               |
|------------------------------------------------------------------------------------------------------------------------------|-------------------|----------------------------------------------------------------------------------------------------------------------------------------------------------------------------------------------------------------------------------------------------------------------------------------------------------------------------------------------------------------------------------------------------------------------------------------------------------------------------------------------------------------------------------------------------------------------------------------------------------------------------------------------------------------------------------------------------------------------------------------------------------------------------------------------------------------------------------------------------------------------------------------------------------------------------------------------------------------------------------------------------|--------------------------------------------------------------------------------------------------------------------------------------------------------------------------------------------------------------------------------|-----------------------------------------------------------------------------------------------------------------------------------------------------------------------------|------------------------------------------------------------------------------------------------------------------------------------------|
| Caliciopsis canker                                                                                                           |                   | <i>Caliciopsis pinea</i>                                                                                                                                                                                                                                                                                                                                                                                                                                                                                                                                                                                                                                                                                                                                                                                                                                                                                                                                                                           | <i>Pinus insignis</i> , <i>P. pinaster</i>                                                                                                                                                                                     | Italy                                                                                                                                                                       | 87                                                                                                                                       |
| Disease name/type                                                                                                            |                   | Pathogen name                                                                                                                                                                                                                                                                                                                                                                                                                                                                                                                                                                                                                                                                                                                                                                                                                                                                                                                                                                                      | Host Plant species*                                                                                                                                                                                                            | Country of detection**                                                                                                                                                      | References                                                                                                                               |
| Cenangium canker or Twig blight                                                                                              |                   | <i>Cenangium ferruginosum</i> (= <i>C. abietis</i> ), <i>Cenangium</i> sp.                                                                                                                                                                                                                                                                                                                                                                                                                                                                                                                                                                                                                                                                                                                                                                                                                                                                                                                         | <i>Pinus halepensis</i> , <i>Pinus</i> spp., <i>P. sylvestris</i>                                                                                                                                                              | Poland, Russia, Spain                                                                                                                                                       | 67, 80, 27, 82                                                                                                                           |
| Phomopsis canker and foliar blight                                                                                           |                   | <i>Phomopsis</i> sp.                                                                                                                                                                                                                                                                                                                                                                                                                                                                                                                                                                                                                                                                                                                                                                                                                                                                                                                                                                               | <i>Pinus pinea</i> , <i>P. sylvestris</i>                                                                                                                                                                                      | Portugal, Ukraine                                                                                                                                                           | 31, 25                                                                                                                                   |
| Rusts                                                                                                                        | Twist rust        | <i>Melampsora pinitorqua</i> , <i>M. larici-populina</i> , <i>Melampsora</i> sp.                                                                                                                                                                                                                                                                                                                                                                                                                                                                                                                                                                                                                                                                                                                                                                                                                                                                                                                   | <i>Pinus halepensis</i> , <i>P. nigra</i> , <i>P. pinea</i> , <i>P. sylvestris</i>                                                                                                                                             | Finland, Italy, Macedonia, Russia, Slovenia, Sweden, Ukraine                                                                                                                | 88, 89, 90, 41, 91, 92, 86, 93, 39                                                                                                       |
|                                                                                                                              | Needle rust       | <i>Coleosporium pini</i> , <i>Coleosporium</i> spp., <i>C. tussilaginis</i> ,                                                                                                                                                                                                                                                                                                                                                                                                                                                                                                                                                                                                                                                                                                                                                                                                                                                                                                                      | <i>Pinus mugo</i> , <i>P. nigra</i> var. <i>maritima</i> , <i>Pinus</i> spp., <i>P. sylvestris</i>                                                                                                                             | Poland, Russia, UK                                                                                                                                                          | 94, 69, 95                                                                                                                               |
| Snow molds                                                                                                                   | Brown felt blight | <i>Herpotrichia juniper</i> , <i>Typhula graminearum</i> , <i>T. incarnata</i> , <i>T. ishikariensis</i>                                                                                                                                                                                                                                                                                                                                                                                                                                                                                                                                                                                                                                                                                                                                                                                                                                                                                           | <i>Pinus nigra</i> , <i>Pinus</i> spp., <i>P. sylvestris</i>                                                                                                                                                                   | Finland, Macedonia, Russia                                                                                                                                                  | 40, 41, 69                                                                                                                               |
|                                                                                                                              | Snow blight       | <i>Phacidium infestans</i>                                                                                                                                                                                                                                                                                                                                                                                                                                                                                                                                                                                                                                                                                                                                                                                                                                                                                                                                                                         | <i>Pinus cembra</i> , <i>Pinus</i> spp., <i>P. sylvestris</i>                                                                                                                                                                  | Estonia, Finland, Lithuania, Russia, Sweden                                                                                                                                 | 96, 40, 69, 97, 98                                                                                                                       |
| Gray mold                                                                                                                    |                   | <i>Botrytis cinerea</i>                                                                                                                                                                                                                                                                                                                                                                                                                                                                                                                                                                                                                                                                                                                                                                                                                                                                                                                                                                            | <i>Pinus mugo</i> , <i>P. nigra</i> , <i>P. sylvestris</i> , <i>Pinus</i> spp.                                                                                                                                                 | Bulgaria, Denmark, Macedonia, Poland, Portugal, Russia, Sweden, Ukraina                                                                                                     | 13, 99, 41, 100, 26, 74, 23, 25, 101                                                                                                     |
| Other fungi isolated occasionally from seeds, seedlings, soil and irrigation water in pine nurseries (EPPO member countries) |                   | <i>Acremonium</i> spp., <i>Alternaria alternata</i> , <i>Alternaria</i> sp., <i>Anthostomella pinea</i> , <i>Armillaria</i> spp., <i>Arthrinium</i> spp., <i>Aspergillus flavus</i> , <i>A. glaucus</i> , <i>A. niger</i> , <i>Aureobasidium pullulans</i> , <i>Cenangium ferruginosum</i> , <i>Cephalosporium</i> spp., <i>Cladosporium cladosporioides</i> , <i>Cl. herbarum</i> , <i>Chrysosporium pannorum</i> , <i>Coniothyrium fuckelii</i> , <i>Epicoccum nigrum</i> , <i>Fusarium moniliforme</i> , <i>F. redolens</i> , <i>Gliocladium roseum</i> , <i>Heterobasidion annosum</i> , <i>H. Irregulare</i> , <i>Lachnellula pini</i> , <i>Mucor</i> spp., <i>Nigrospora</i> sp., <i>Ophiostoma minus</i> , <i>Ostrachoderma</i> spp., <i>Paecilomyces farinosus</i> , <i>P. variotii</i> , <i>Penicillium chrysogenum</i> , <i>P. expansum</i> , <i>P. purpureum</i> , <i>Penicillium</i> spp., <i>Phoma fimeti</i> , <i>Rhizina undulata</i> , <i>Rhizopus nigricans</i> , <i>Rhizopus</i> | <i>Pinus contorta</i> , <i>P. eldarica</i> , <i>P. halepensis</i> , <i>P. mugo</i> , <i>P. nigra</i> , <i>P. pinaster</i> , <i>P. pinea</i> , <i>P. radiata</i> , <i>Pinus</i> spp., <i>P. sylvestris</i> , <i>P. uncinata</i> | Algeria, Belarus, Bulgaria, Czech Republic, Finland, Italy, Lithuania, Macedonia, Poland, Portugal, Romania, Russia, Slovakia, Slovenia, Spain, Sweden, Turkey, Ukraine, UK | 102, 103, 12, 104, 40, 105, 57, 58, 106, 41, 67, 107, 108, 109, 17, 26, 31, 110, 68, 69, 74, 91, 111, 70, 75, 112, 113, 114, 23, 24, 115 |

Table S5. Common pathogens causing damages on pines in European nurseries

*spp.*, *Sclerophoma pythiophila*,  
*Sclerotinia sclerotiorum*,  
*Solenophoma pythiophilla*,  
*Stemphylium spp.*, *Sydowia*  
*polyspora*, *Telephora terrestris*,  
*Trichoderma viride*, *T. koningii*,  
*Trichotecium roseum* *Truncatella*  
*angustata*, *T. hartigii*, *Ulocladium*  
*atrum*, *Verticillium*  
*chlamydosporum*, *Verticillium*  
*spp.*

\*Not all the coniferous species listed in a row were reported to be infected by all pathogen species, but at least by one of them.

\*\* Not all pathogen species in a row were found in all listed countries, but at least in one of them.

Table. – Reports of Pine Pitch Canker Disease in pine nurseries from all over the world and reports of other fungal diseases of pine seedlings in nurseries from countries of the Euro-Mediterranean region. As for the pathogens with a worldwide distribution only reports on pine seedlings in nurseries from the Euro-Mediterranean region have been highlighted.

## References - Table diseases in nurseries

1. Swett, C.L.; Gordon, T.R. First report of grass species (Poaceae) as naturally occurring host of the pine pathogen *Gibberella circinata*. *Plant Dis.* **2012**, *96*, 908.
2. McCain, A.H.; Koehler, C.S.; Tjosvold, S.A. Pitch canker threatens California pines. *Calif. Agr.* **1987**, *41*, 22-23.
3. Steenkamp, E.; Rodas, C.A.; Kvas, M.; Wingfield, M. *Fusarium circinatum* and pitch canker of *Pinus* in Colombia. *Australas. Plant Path.* **2012**, *41*, 483-491.
4. Viljoen, A.; Wingfield, M.J.; Marasas, W.F.O. First report of *Fusarium subglutinans* f. sp. *pini* on seedlings in South Africa. *Plant Dis.* **1994**, *78*, 309-312.
5. Wingfield, M.J.; Hammerbacher, A.; Ganley, R.J.; Steenkamp, E.T.; Gordon, T.R.; Wingfield, B.D.; Coutinho, T.A. Pitch canker caused by *Fusarium circinatum* - A growing threat to pine plantations and forests worldwide. *Australas. Plant Path.* **2008**, *37*, 319-334.
6. Bragança, H.; Diogo, E.; Moniz, F.; Amaro, P. First report of pitch canker on pines caused by *Fusarium circinatum* in Portugal. *Plant Dis.* **2009**, *93*, 1079.
7. Landeras, E.; García, P.; Fernández, Y.; Braña, M.; Fernández-Alonso, O.; Méndez-Lodos, S.; Pérez-Sierra, A.; León, M.; Abad-Campos, P.; Berbegal, M.; Beltrán, R.; García-Jiménez, J.; Armengol, J. Outbreak of Pitch Canker Caused by *Fusarium circinatum* on *Pinus* spp. in northern Spain. *Plant Dis.* **2005**, *89*, 1015-1015.
8. Pfenning, L.H.; Costa, S.S.; Melo, M.P.; Costa, H.; Ventura, J.A.; Auer, C.G.; Figueredo, A. First report and characterization of *Fusarium circinatum*, the causal agent of pitch canker in Brazil. *Trop. Plant Pathol.* **2014**, *39*, 210.
9. Alonso, R.; Bettucci, L. First report of the pitch canker fungus *Fusarium circinatum* affecting *Pinus taeda* seedlings in Uruguay. *Australas. Plant Dis. Notes* **2009**, *4*, 91-92.
10. EPPO. *Gibberella circinata* detected again in France. *EPPO Reporting Service* **2010**, *2*, Num. article: 2010/034.
11. Wingfield, M.J.; Jacobs, A.; Coutinho, T.A.; Ahumada, R.; Wingfield, B.D. First report of the pitch canker fungus, *Fusarium circinatum*, on pines in Chile. *Plant Pathol.* **2002**, *51*, 397.
12. Rossnev, B.; Petkov, P.; Naydenov, Y.; Tsankov, G.; Pencheva, A.; Burdarov, D. *Diseases and Pests in Forest Nurseries*; Sofia, Bulgaria, 1994; pp. 40. [in Bulgarian]

Table S5. Common pathogens causing damages on pines in European nurseries

13. Dobreva, M.; Georgieva, M.; Dermedzhiev, P.; Nachev, R.; Velinov, V.; Terziev, P.; Georgiev, G. Fungal pathogens associated with *Pinus* species in the region of forest protection station Plovdiv in the period 2013-2016. *Forest Science*, **2016**, 52 (1/2), 103-116. [in Bulgarian, English summary]
14. Læssøe T., Petersen J. H., Heilmann-Clausen J., Søchting U., Frøslev T., Jeppesen T. S. Danish Mycological Society - Checklist of Fungi. Version 1.8. Danish Mycological Society; **2017** Checklist Dataset <https://doi.org/10.15468/9zvqgf> accessed via GBIF.org on 2018-03-28.
15. Tokumasu, S., Aoki, T., Oberwinkler, F. Fungal succession on pine needles in Germany. *Mycoscience* **1994**, 35, 29-37.
16. Dabkevičius Z.; Vasiliauskas A.; Žiogas, A. *Miško fitopatologija*. Kaunas, **2006**. [In Lithuanian]
17. Ferreira, M.C.; Ferreira, G.W.S.; Fonseca, N. *Manual de Sanidade dos Viveiros Florestais*; Instituto de Estruturas Agrárias e Desenvolvimento Rural; Lisboa, Portugal 1994; 493pp. [In Portuguese]
18. Tăut I.; Simonca V. Pathogens Identified in the Forest Culture in Transylvania in the 2010 Year. *Bulletin UASVM Horticulture*, **2011**, 68(1).
19. Zhukov, A. M.; Zhukov, P. D. *Atlas of Fungal Diseases of Seeds of Conifer Trees*; Pushkino (Moscow), 2012; pp. 36 [In Russian]
20. Martín-Pinto, P.; Pajares, J.; Pando, V.; Diez, J. Fungi isolated from diseased nursery seedlings in Spain. *New Forest* **2006**, 31, 41-56.
21. Martín-Pinto, P.; Pajares, J.; Diez, J. Pathogenicity of *Fusarium verticillioides* and *Fusarium oxysporum* on *Pinus nigra* seedlings in northwest Spain. *Forest Pathol.* **2008**, 38, 78-82.
22. Soldevilla, C. Marras de origen fúngico (Damping-off) en plantas del género *Pinus* sp. cultivadas en invernadero. *Bol. San. Veg. Plagas* **1995**, 21, 87-109,
23. Beyer-Ericson, L.; Damm, E.; Unestam, T. An overview of root dieback and its causes in Swedish forest nurseries. *Eur. J. For. Pathol.* **1991**, 21, 439-443
24. Akıllı S.; Katırcıoğlu Y. Z.; Maden S. Türkiye'deki bazı orman fidanlıklarında fungusların neden olduğu hastalıklar üzerinde çalışmalar. *Düzce Üniversitesi, Ormancılık Dergisi* **2010**, 6, 1-10. [In Turkish]
25. Davydenko, K.; Vasaitis, R.; Menkis, A. Fungi associated with *Ips acuminatus* (Coleoptera: Curculionidae) in Ukraine with a special emphasis on pathogenicity of ophiostomatoid species. *European Journal of Entomology* **2017**, 114, 77.
26. Branco, M.; Bragança, H.; Sousa, E.; Phillips, A. Pests and Diseases in Portuguese Forestry: Current and New Threats - Chapter V. In *Forest Context and Policies in Portugal-Present and Future Challenges*; F. Reboredo Ed. Present and Future Challenges, Series: World Forests, Vol. 19, Springer International Publishing, 2014; pp.239.
27. Zhukov, A.M.; Gninenko, Y.I.; Zhukov, P.D. *Dangerous and Poorly Studied Diseases of Coniferous Trees in Forests of Russia*, 2nd ed.; Pushino (Moscow), Russia, 2013; pp. 128. [In Russian]
28. Andicoberry, S.; Lora, F.; Trapero, A; Etiología de las podredumbres radicales de plántulas de *Quercus* spp. y *Pinus halepensis* en viveros forestales de Andalucía. In *Actas del III Congreso Forestal Español. Mesa 6: Protección y restauración del medio natural*, Granada 2001; pp. 153-158.
29. Unestam, T.; Beyer-Ericson, L.; Strand, M. (1989). Involvement of *Cylindrocarpon destructans* in root death of Scots pine seedlings: pathogenic behaviour and predisposing factors. *Scand. J. For. Res.* **1989**, 4, 521-535.
30. Reuveni, R.; Madar, Z. The role of *Macrophomina phaseolina* in mortality of pine seedlings in forest nurseries. *Phytopathol. Z.* **1985**, 112, 161-164.
31. Bragança, H., Inácio, M.L.; Diogo, E. *Detection of Pine Needle Diseases In Portugal*; Cost Action Fp1102 – DIAROD Annual Workshop. 6th August - 9th August, Aberdeen University, UK 2012. [Poster]
32. Özdamar, H.T.. Ege ve Göller Bölgesi Orman Fidanlıklarında Çökerten Hastalığının Önemi, Etmenleri ve Savaşım Olanakları Üzerine Araştırmalar. Ege Üniversitesi, Fen Bilimleri Enstitüsü Doktora Tezi, 1999. [In Turkish]
33. Erwin, D.C.; Ribeiro, O.K. . *Phytophthora Diseases Worldwide*; Cambridge University Press: St Paul, Minnesota, The American Phytopathological Society, 1996; pp. 562.
34. Jung, T.; Orlikowski, L.; Henricot, B.; Abad-Campos, P.; Aday A.G.; Aguin Casal, O.; Bakonyi, J.; Cacciola, S.O.; Cech, T.; Chavarriaga, D.; Corcobado, T.; Cravador, A.; Decourcelle, T.; Denton, G.; Diamandis, S.; Dogmus-Lehtijarvi, H.T.; Franceschini, A.; Ginetti, B.; Green, S.; Glavendekic, M.; Hantula, J.; Hartmann, G.; Herrero, M.; Ivic, D.; Horta Jung, M.; Lilja, A.; Keca, N.; Kramarets, V.; Lyubenova, A.; Machado, H.; Magnano di San Lio, G.; Mansilla, P.; Vazquez, J.; Marcais, B.; Matsiakh, I.; Milenkovic, I.; Moricca, S.; Nagy, Z.A.; Nechwatal, J.; Olsson, C.; Oszako, T.; Pane, A.; Paplomatas, E.J.; Pintos Varela, C.; Prospero, S.; Rial Martinez, C.; Rigling, D.; Robin, C.; Ryttonen, A.; Sanchez, M.E.; Sanz-Ros, A.V.; Scanu, B.; Schlenzig, A.; Schumacher, J.; Slavov, S.; Solla, A.; Sousa, E.; Stenlid, J.; Talgø, V.; Tomic, Z.; Tsopelas, P;

Table S5. Common pathogens causing damages on pines in European nurseries

- Vannini, A.; Vettraino, A.M.; Wenneker, M.; Woodward, S.; Perez-Sierra, A. Widespread *Phytophthora* infestations in European nurseries put forest, semi-natural and horticultural ecosystems at high risk of *Phytophthora* diseases. *Forest Pathology* **2016**, *46*, 134-163.
35. Tkaczyk, M.; Sikora, K.; Nowakowska, J.A.; Aniśko, E.; Oszako, T.; Belbahri, L.; Milenković, I. Four different *Phytophthora* species that are able to infect Scots pine seedlings in laboratory conditions. *Folia Forestalia Polonica* **2016**, *58*, 123-130.
36. Moralejo, E.; Pérez-Sierra, A.M.; Álvarez, L. A.; Belbahri, L.; Lefort, F.; Descals, E.. Multiple alien *Phytophthora* taxa discovered on diseased ornamental plants in Spain. *Plant Pathology* **2009**, *58*, 100–110.
37. Lehtijärvi, A.; Aday Kaya, A.G.; Woodward, S.; Jung, T.; Doğmuş Lehtijärvi, H.T. Oomycota species associated with deciduous and coniferous seedlings in forest tree nurseries of Western Turkey. *Forest Pathology* **2017**, *47*(5), e12363.
38. Churakov, V.P.; Churakov D.B. *Forest Phytopathology*. Saint Petersburg, Russia, 2012; pp. 448. [in Russian]
39. Davydenko, K.; Meshkova, V. 2011. Prevalence of pathogens of needles and shoots in pine seedlings in the Kharkiv region. *Journal of Kharkiv National Agricultural University (Ser. Phytopathology and Entomology)* **2011**, *9*, 57-62. [ in Ukrainian]
40. Lilja, A.; Poteri, M.; Petäistö, R.L.; Rikala, R.; Kurkela, T.; Kasanen, R. 2010. Fungal diseases in forest nurseries in Finland. *Silva Fenn.* **2010**, *44*, 525–545.
41. Papazova-Anakieva, I.; Naceski, S. Important plant pathogens in nurseries for production of forest and ornamental plants in R. Macedonia. *Plant protection* **2012**, *23*, 83-91.
42. Stępniewska-Łarosz, S.; Mańka, M.; Asiegbu, F.O. Studies on anastomosis groups of *Rhizoctonia solani* isolates causing disease in two forest nurseries in Poland. *Forest Pathology* **2006**, *36*, 97-109.
43. Duda, B.; Orlikowski, L.B. *Rhizoctonia solani* on coniferous seedlings in forest nurseries. *J. Plant Prot. Res.* **2004**, *44*, 175–180.
44. EPPO. PM 7/46 (3) *Lecanosticta acicola* (formerly *Mycosphaerella dearnessii*), *Dothistroma septosporum* (formerly *Mycosphaerella pini*) and *Dothistroma pini*. *EPPO Bulletin* **2015**, *45*, 163-182.
45. Markovskaja, S.; Kačergius, A.; Treigienė, A.. Occurrence of new alien pathogenic fungus *Mycosphaerella dearnessii* in Lithuania. *Bothanica Lithuanica* **2011**, *17*, 29-37.
46. CABI. Invasive Species Compendium. *Mycosphaerella dearnessii* (brown spot needle blight), 2018; <https://www.cabi.org/isc/datasheet/49057>
47. Barnes, I.; van der Nest, A.; Mullett, M.S.; Crous, P.W.; Drenkhan, R.; Musolin, D.L.; Wingfield, M.J. Neotypification of *Dothistroma septosporum* and and epitypification of *D. pini*, causal agents of Dothistroma needle blight of pine. *Forest Pathology*, **2016**, *46*, 388-407.
48. Drenkhan, R.; Tomešová-Haataja, V.; Fraser, S.; Bradshaw, R.E.; Vahalik, P.; Mullett, M.S.; Martín-García, J.; Bulman, L.S.; Wingfield, M.J.; Kirisits, T.; Cech, T.L.; Schmitz, S.; Baden, R.; Tubby, K.; Brown, A.; Georgieva, M.; Woods, A.; Ahumada, R.; Jankovský, L.; Thomsen, I.M.; Adamson, K.; Marçais, B.; Vuorinen, M.; Tsopelas, P.; Koltay, A.; Halasz, A.; La Porta, N.; Anselmi N.; Kiesnere, R.; Markovskaja, S.; Kačergius, A.; Papazova-Anakieva, I.; Risteski, M.; Sotirovski, K.; Lazarević, J.; Solheim, H.; Boroń, P.; Bragança, H.; Chira, D.; Musolin, D.L.; Selikhovkin, A.V.; Bulgakov, T.S.; Keča, N.; Karadžić, D.; Galovic, V.; Pap, P.; Markovic, M.; Poljakovic Pajnik, L.; Vasic, V.; Ondrušková, E.; Piškur, B.; Sadiković, D.; Diez, J.J.; Solla, A.; Millberg, H.; Stenlid, J.; Angst, A.; Queloz, V.; Lehtijärvi, A.; Doğmuş-Lehtijärvi, H.T.; Oskay, F.; Davydenko, K.; Meshkova, V.; Craig, D.; Woodward, S.; Barnes, I.; Cleary, M. Global geographic distribution and host range of *Dothistroma* species: a comprehensive review. *Forest Pathology* **2016**, *46*, 408-442.
49. Mullett, M.S.; Brown A.V.; Fraser, S.; Baden, R.; Tubby, K.V. Insights into the pathways of spread and potential origins of *Dothistroma septosporum* in Britain. *Fungal Ecology* **2017**, *26*, 85-98.
50. CABI. Invasive Species Compendium. *Mycosphaerella pini* (Dothistroma blight); 2018; <https://www.cabi.org/isc/datasheet/49059>
51. Markovskaja, S.; Kačergius, A.; Davydenko, K.; Fraser, S. First record of *Neocatenulostroma germanicum* on pines in Lithuania and Ukraine and its co-occurrence with *Dothistroma* spp. and other pathogens. *Forest Pathology* **2016**, *46*, 522-533.
52. Millberg H, Hopkins AJM, Boberg J, Davydenko K, Stenlid J,. Disease development of Dothistroma needle blight in seedlings of *Pinus sylvestris* and *Pinus contorta* under Nordic conditions. *Forest Pathology* **2016**, *46*: 515-521.
53. CABI. Invasive species compendium. *Sphaeropsis sapinea* (Sphaeropsis blight); 2018; <https://www.cabi.org/isc/datasheet/19160>

Table S5. Common pathogens causing damages on pines in European nurseries

54. Hanso, M.; Drenkhan, R. *Diplodia pinea* is a new pathogen on Austrian pine (*Pinus nigra*) in Estonia. *Plant Pathology. New Disease Reports* **2009**, *58*, 797–797.
55. Kailidis, D.S. *Forest Pathology*; Yachoudi-Yapouli Editions: Thessaloniki, Greece, 1985.; pp. 298–301. [in Greek]
56. Luchi, N.; Pratesi, N.; Simi, L.; Pazzagli, M.; Capretti, P.; Scala, A.; Slippers, B.; Pinzani, P. High-resolution melting analysis: a new molecular approach for the early detection of *Diplodia pinea* in Austrian pine. *Fung. Biol.* **2011**, *115*, 715–723.
57. Kutorga, E.; Iršėnaitė, R.; Iznova, T.; Kasparavičius, J.; Markovskaja, S.; Motiejūnaitė, J. Species diversity and composition of fungal communities in a Scots pine forest affected by the great cormorant colony. *Acta Mycol.*, **2013**, *48*, 173–188.
58. Kutorga, E.; Adamonyte, G.; Iršėnaitė, R.; Kasparavičius, J.; Markovskaja, S.; Motiejūnaitė, J.; Treigienė, A. A checklist of mycobiota recorded in burnt and unburnt *Pinus mugo* plantations in the Curonian Spit (Lithuania). *Botanica Lithuanica* **2012**, *18*, 66–79.
59. Juhászová, G.; Adamčíková, K.; Kobza, M. Sphaeropsis tip blight disease of Austrian pine in urban greenery. *Horticultural Science* **2006**, *33*, 11–15.
60. Iturrutxa, E.; Ganley, R.J.; Raposo, R.; García-Serna, I.; Mesanza, N.; Kirkpatrick, S.C.; Gordon, T.R. Resistance levels of Spanish conifers against *Fusarium circinatum* and *Diplodia pinea*. *Forest Pathology* **2013**, *43*, 488–495.
61. Millar, C.S.; Minter, D.W. *Naemacyclus minor*; CMI Descriptions of Pathogenic Fungi and Bacteria No. 659; CMI: Kew, Surrey, England, 1980.
62. CABI. Invasive species compendium. *Cyclaneusma minus* (Cyclaneusma needle-cast); 2018, <https://www.cabi.org/isc/datasheet/35675>
63. Bentele, M.; Morgensten, K.; Krabel, D. *Lophodermium seditiosum* Minter, Staley & Millar seed-borne on *Pinus sylvestris*. *Journal of Forest and landscape Research* **2014**, *1*, 1–8.
64. Petkov, P. Comparative studies of the resistance of scots pine (*Pinus sylvestris* L.) provenances to *Lophodermium pinastri* (Schrad.) Chev. complex in some regions of the country. *Forest Science* **1993**, *3*, 63–68. [in Bulgarian, with English summary]
65. Hanso, M.; Hanso, S. The genesis of fungal diseases in forest nurseries, plantations and forest stands. Metsanduslikud uurimused XXXVIII, 74–84/*Forestry Studies* **2003**, *38*, 74–84. [In Estonian with English summary].
66. Kowalski, T. Fungi infecting *Pinus sylvestris* needles of various age. *Forest Pathology* **2007**, *12*, 182–190.
67. Kowalski, T. Fungi infecting needles of *Pinus sylvestris* in Poland in relation to air pollution zone. In Millar, C.S (ed).: *Current Research on Conifer Needle Diseases. Proceedings of the IUFRO Working Party on Needle Diseases* 1981, pp. 93–98.
68. Hârăuța, O.; Fodor, E.; Teușdea A. 2007. Complex diseases in *Pinus nigra* Arnold situated along Crișul Repede River Gorge. *Analele ICAS* **2007**, *50*, 169–184. [In Romanian]
69. Kuz'michev, E.P.; Sokolova, E.S.; Kulikova, E.G. *Common fungal diseases of Russian forests*. General Technical Report. NE-279, Newtown Square, P.A.: USDA Forest Service, Northeastern Research Station, 2001; pp.137.
70. Jurc, D. Bori - Bolezni iglic. *Lophodermium seditiosum*, *Mycosphaerella pini*, *Mycosphaerella dearnessii*, *Cyclaneusma minus*. *Gozdarski Vestnik* **2007**, *65*, 321–336. [ In Slovenian with an English summary].
71. Stenström, E.; Arvidsson, B. Fungicidal control of *Lophodermium seditiosum* on *Pinus sylvestris* seedlings in Swedish forest nurseries. *Scandinavian Journal of Forest Research* **2001**, *16*, 147–154.
72. Millberg, H.; Boberg, J.; Stenlid, J. Changes in fungal community of Scots pine (*Pinus sylvestris*) needles along a latitudinal gradient in Sweden. *Fungal Ecology* **2016**, *17*, 126–139.
73. Phillips, D.H., Burdekin, D.A. Diseases of pine (*Pinus* spp.). In: *Diseases of Forest and Ornamental Trees*; Palgrave Macmillan: London, **1982**; pp. 139–162
74. Kuz'michev, E.P.; Sokolova, E.S.; Mozolevskaya, E.G. *Diseases of woody trees: directory - Diseases and pests in Russian forests Vol. I* [Bolezni drevesnykh rasteniy: spravochnik - Bolezni i vrediteli v lesakh Rossii. Tom 1.]: Russian Research institute for Silviculture and Mechanization of Forestry (VNIILM), Moscow, **2004**; pp. 120 [in Russian].
75. Muñoz, C.; Pérez, V.; Cobos, P.; Hernández, R.; Sánchez, G. *Sanidad Forestal. Guía en Imágenes de Plagas, Enfermedades y Otros agentes en los Bosques*; Ediciones Mundi-Prensa; Madrid, Espana, 2007; pp. 576. [In Spanish]
76. OEPP/EPPO. PM7/92(1) *Gremmeniella abietina*. *Bulletin OEPP/EPPO Bulletin* **2009**, *39*, 310–317.



Table S5. Common pathogens causing damages on pines in European nurseries

77. CABI. Invasive Species Compendium. *Gremmeniella abietina* (Brunckhorstia disease); 2017. <https://www.cabi.org/isc/datasheet/25892>
78. Drenkhan, R.; Hanso, M. Alterations of Scots pine needle characteristics after severe weather conditions in south-eastern Estonia. *Aktuelt fra skogforskningen*, **2006**, *1*, 63-68.
79. Nevalainen, S. *Gremmeniella abietina* in Finnish *Pinus sylvestris* stands in 1986-1992: A Study Based on the National Forest Inventory. *Scand. J. For. Res.* **1999**, *14*, 111-120.
80. Donaubauer, E. Distribution and hosts of *Scleroderris lagerbergii* in Europe and North America. *Forest Pathology*, **1972**, *2*, 6-11.
81. Kraj, W.; Kowalski, T. Genetic variation in Polish strains of *Gremmeniella abietina*. *Forest Pathology*, **2008**, *38*, 203-217.
82. Santamaría, O.; Tejerina, L.; Pajares, J.A.; Diez, J.J. Effects of associated fungi *Sclerophoma pythiophila* and *Cenangium ferruginosum* on *Gremmeniella abietina* dieback in Spain. *For. Pathol.* **2007**, *37*, 121-128.
83. Karlman, M.; Hansson, P.; Witzell, J. Scleroderris canker on Lodgepole pine introduced in Northern Sweden. *Can. J. For. Res.*, **1994**, *24*, 1948-1959.
84. Hansson, P. *Gremmeniella abietina* in northern Sweden: silvicultural aspects of disease development in the introduced *Pinus contorta* and in *Pinus sylvestris*. Dissertation. Swedish University of Agricultural Sciences, Umeå. *Acta Universitatis Agriculturae Sueciae, Silvestria* **1996**, *10*, 1-40.
85. Muñoz, C. Tipificación de los daños producidos por *Sirococcus conigenus* Cannon & Minter en los brotes de *Pinus halepensis* Miller. Localización del hongo y características de sus aislamientos. *Bol. San. Veg. Plagas* **1999**, *25*, 557-571. [In Spanish]
86. Stenström, E. Svampar - de vanligaste skadorna (Fungi - the most common damage). *Plantaktuellt* **2008**, *4*, 32-35. [In Swedish]
87. Capretti, P. *Caliciopsis pinea* Peck. parassita di *Pinus pinaster* e *Pinus insignis*. *Phytopathol. Medit.* **1978**, *17*, 101-104.
88. Kurkela, T. Release and germination of basidiospores of *Melampsora pinitorqua* (Braun) Rostr. and *M. larici-tremulae* Kleb. at various temperatures. *Metsantutkimuslaitoksen Julkaisuja* **1973**, *78*, 22.
89. Longo, N.; Moriondo, F.; Naldini Longo, B.M. Some aspects of biology of *Melampsora pinitorqua* Rostr. in Italy, also compared to other European countries. *Phytopathol. Mediterr.* **1980**, *19*, 30-34.
90. Longo, N.; Naldini, B.M.; Paolillo, A.; Drovandi F.; Gonnelli, T. Signs of resistance to *Melampsora larici-tremulae* on species of *Pinus* hosts of *Melampsora pinitorqua* : implications regarding the taxonomic relationship between the two rust fungi *Phytopathol. Mediterr.* **2002**, *41*, 212-219.
91. Sokolova, I.G.; Semenkov, E.S. *Phytopathology Textbook*. Moscow Academia, Moscow, Russia, 2003; pp. 480 [In Russian]
92. Jurc, D. Bolezni poganjkov, vej in debla. *Gremmeniella abietina*, *Cronartium flaccidum*, *Melampsora pinitorqua*. *Gozdarski Vestnik*, **2007**, *65*, 89-104. [In Slovenian with an English summary]
93. Martinsson, O. The influence of pine twist rust (*Melampsora pinitorqua*) on growth and development of Scots pine (*Pinus sylvestris*). *Eur. J. For. Path.*, **1985**, *15*, 103-110.
94. Pusz, W.; Włodzimierz, K. Ocena zdrowotności igieł kosodrzewiny (*Pinus mugo* Turra) w Karkonoskim Parku Narodowym. *Opera Corcontica* **2014**, *51*, 41-48. [In Polish]
95. Gregory, S.C.; Redfern, D.B. Diseases and Disorders of Forest Trees: a guide to Identifying causes of ill-health in woods and plantations (Forestry Commission Field Guides, Field Book 16); Great Britain: Forestry Commission, UK, 1998; pp.136.
96. Hanso, M. Phacidium snow blight in the Baltic countries. *Metsanduslikud uurimused XXXIV/Forestry Studies* **2000**, *34*, 64-74.
97. Tkachenko, O.B. Snow Mold Fungi in Russia. In: *Plant and microbe adaptation to cold in changing world: Proceedings of the plants and microbe adaptation to cold conference 2012*. Imai R, Yoshida M., Matsumoto N. Eds.. Springer, New York, 2013; pp. 293-303.
98. Tronsmo A.N. 2013. Snow Moulds in a Changing Environment—A Scandinavian Perspective. In: *Plant and microbe adaptation to cold in changing world: Proceedings of the plants and microbe adaptation to cold conference 2012*. Imai R, Yoshida M., Matsumoto N. Eds.. Springer, New York, 2013; pp. 305-317.
99. Frøslev, T.G.; Heilmann-Clausen, J.; Lange, C.; Læssøe, T.; Petersen, J. H., Søchting, U.; Jeppesen, T.S.; Vesterholt, J. Checklist of Danish Fungi. Version 1.8. Danish Mycological Society. Checklist dataset 2019 <https://doi.org/10.15468/cy3if7> accessed via GBIF.org on 2019-10-04.
100. Domański, S.; Kowalski, T. Untypical dieback of the current season's shoots of *Pinus sylvestris* in Poland. *Forest Pathology* **1988**, *18*, 157-160.



Table S5. Common pathogens causing damages on pines in European nurseries

101. Davydenko, K.; Vasaitis, R.; Meshkova, V.; Menkis, A.. Fungi associated with the red-haired bark beetle, *Hylurgus ligniperda* (Coleoptera: Curculionidae) in the forest-steppe zone in eastern Ukraine. *European Journal of Entomology* **2014**, *111*, 561-565.
102. Lazreg, F.; Belabid, L.; Sanchez, J.; Gallego, E.; Garrido-Cardenas, J. A.; Elhaitoum, A. First report of *Fusarium redolens* as a causal agent of Aleppo pine damping-off in Algeria. *Plant Disease* **2013**, *97*, 997.
103. Fedorov, N.I. *Forest Phytopatology. Textbook*. 3rd ed.; Belorussian State Technological University, Minsk, Belarus, 2004; pp. 462. [In Russian]
104. Bednářová, M.; Dvořák, M.; Janoušek, J.; Jankovský, L.,. Other foliar diseases of coniferous trees. In *Infectious Forest Diseases*; Gonthier, P., Nicolotti G., Eds.; CAB International, Wallingford, UK, 2013; pp.458-487.
105. Motta E., Le malattie nel vivaio forestale. Capitolo VI. In *Elementi di Patologia Forestale*; Capretti P., Ragazzi A., Eds; Patron Editore, Granarolo dell'Emilia, Bologna, Italy, 2009; pp.291-305. [In Italian]
106. Menkis A.; Vasiliauskas, R.; Taylor, A.F.S.; Stenlid, J.; Finlay, R. Fungal communities in mycorrhizal roots of conifer seedlings in forest nurseries under different cultivation systems, assessed by morphotyping, direct sequencing and mycelial isolation. *Mycorrhiza*, **2005**, *16*, 33-41.
107. Kowalski, T, Zych P. Fungi isolated from living symptomless shoots of *Pinus nigra* growing in different site conditions. *Österr Z Pilzk.* **2002**, *11*, 107-117.
108. Kowalczyk A, Kacprzak M, Mańka M. Fungi inhabiting Scots pine (*Pinus sylvestris*) seeds in various stages of extraction process. *Phytopathol. Pol.* **2004**, *3*, 53–70.
109. Jankowiak, R. Fungi associated with *Tomicus piniperda* in Poland and assessment of their virulence using Scots pine seedlings. *Annals of Forest Science* **2006**, *63*, 801-808.
110. Azevedo N.F.S. *Forest Tree Diseases*. Direccção dos Serviços Florestais e Aquícolas, Lisboa, 197; pp. 101.[In Portuguese]
111. Ivanová H. Fungi associated with a decline of *Pinus nigra* in urban greenery. *Acta Fytotechnica et Zootechnica* **2015**, *18*, 36-43
112. Soldevilla, C.. Marras de origen fúngico ( Damping-off ) en plantas del género *Pinus* sp . cultivadas en invernadero. *Boletín de Sanidad Vegetal* **1995**, *21*, 87–109. [In Spanish]
113. Zamora, P.; Martínez-Ruiz C.; Diez J.J. Fungi in needles and twigs of pine plantations from northern Spain. *Fungal Diversity* **2008**, *30*, 171-184.
114. Muñoz, C.; Pérez, V.; Cobos, P.; Hernández, R.; Sánchez, G.. *Sanidad Forestal. Guía en Imágenes de Plagas, Enfermedades y Otros agentes en los Bosques*; Ediciones Mundi-Prensa, Madrid, Spain, 2007; pp. 575. [In Spanish]
115. Batko, S.; Murray, J.S.; Peace, T.R. *Sclerophoma pithyophila* associated with needle-cast of pines and its connexion with *Pullularia pullulans*. *Transactions of the British Mycological Society* **1958**, *41*, 126-128.
116. Davydenko, K.; Meshkova, V. Prevalence of pathogens of needles and shoots in pine seedlings in the Kharkiv region. *Journal of Kharkiv National Agricultural University (Ser. Phytopathology and Entomology)*. **2011**, *9*, 57-62. [In Ukrainian]
