# Supplementary material
Source: MDPI journal article supplement (https://www.mdpi.com/1999-4907/11/1/7)
Supplement: s1 [file s1]

Table S1: Common pathogens causing root and butt rot on pines in European forest stands

| Pathogen name                                           | Country of detection                                  | Host species                                                                                                                                                    | References                 |
|---------------------------------------------------------|-------------------------------------------------------|-----------------------------------------------------------------------------------------------------------------------------------------------------------------|----------------------------|
| <b><i>Armillaria</i> (Fr.) Staude</b>                   | Poland, Russia, Spain, United Kingdom                 | <i>Pinus</i> spp., <i>P. contorta</i> , <i>P. nigra</i> , <i>P. radiata</i> , <i>P. sylvestris</i>                                                              | 1, 2, 3, 4, 5, 6           |
| <b><i>Armillaria borealis</i> Marxm. &amp; Korhonen</b> | France, Switzerland                                   | <i>P. mugo</i>                                                                                                                                                  | 7                          |
| <b><i>Armillaria cepistipes</i> Velen.</b>              | Switzerland, Greece                                   | <i>P. mugo</i> , <i>P. halepensis</i> , <i>P. sylvestris</i> , <i>Pinus nigra</i> , <i>Pinus pinaster</i>                                                       | 7, 8                       |
| <b><i>Armillaria gallica</i> Marxm.</b>                 | Greece                                                | <i>P. halepensis</i> , <i>P. sylvestris</i> , <i>P. nigra</i> , <i>P. pinaster</i>                                                                              | 8, 9                       |
| <b><i>Armillaria mellea</i> (Vahl) P. Kumm.</b>         | Bulgaria, France, Germany, Greece, Lithuania, Ukraine | <i>P. sylvestris</i> , <i>P. cembra</i> , <i>P. monticola</i> , <i>P. mugo</i> , <i>P. nigra</i> , <i>P. pinaster</i> , <i>P. strobus</i> , <i>P. griffithi</i> | 10, 11, 12, 13, 14, 15, 16 |
| <b><i>Armillaria ostoyae</i> (Romagn.) Herink</b>       | France, Germany, Greece, Poland, Romania, Switzerland | <i>P. halepensis</i> , <i>P. sylvestris</i> , <i>P. mugo</i> , <i>P. nigra</i> , <i>P. pinaster</i>                                                             | 8, 9, 17, 18, 19, 20, 21   |
| <b><i>Armillaria tabescens</i> (Scop.) Emel</b>         | Greece                                                | <i>P. nigra</i>                                                                                                                                                 | 9                          |
| <b><i>Botryotinia fuckeliana</i> (de Bary) Whetzel</b>  | Ukraine                                               | <i>P. sylvestris</i>                                                                                                                                            | 22                         |
| <b><i>Abortiporus borealis</i> (Fr.) Singer</b>         | Russia                                                | <i>Pinus</i> spp.                                                                                                                                               | 23                         |

Table S1: Common pathogens causing root and butt rot on pines in European forest stands

| Pathogen name                                                         | Country of detection                                                                                                                                     | Host species                                                                                                                                                                                                                                                                                                                                | References                                                                                                               |
|-----------------------------------------------------------------------|----------------------------------------------------------------------------------------------------------------------------------------------------------|---------------------------------------------------------------------------------------------------------------------------------------------------------------------------------------------------------------------------------------------------------------------------------------------------------------------------------------------|--------------------------------------------------------------------------------------------------------------------------|
| <b><i>Fomitopsis pinicola</i> (Sw.) P. Karst.</b>                     | Russia, Spain, Ukraine                                                                                                                                   | <i>Pinus</i> spp., <i>P. sylvestris</i>                                                                                                                                                                                                                                                                                                     | 6, 4, 22                                                                                                                 |
| <b><i>Fomitopsis officinalis</i> (Batsch) Bondartsev &amp; Singer</b> | Russia                                                                                                                                                   | <i>Pinus</i> spp.                                                                                                                                                                                                                                                                                                                           | 23                                                                                                                       |
| <b><i>Fusarium compactum</i> (Wollenw.) W.L. Gordon</b>               | Israel                                                                                                                                                   | <i>P. brutia</i> , <i>P. canariensis</i> , <i>P. halepensis</i> , <i>P. maritima</i> , <i>P. pinea</i>                                                                                                                                                                                                                                      | 24                                                                                                                       |
| <b><i>Fusarium equiseti</i> (Corda) Sacc.</b>                         | Israel                                                                                                                                                   | <i>P. pinea</i>                                                                                                                                                                                                                                                                                                                             | 25                                                                                                                       |
| <b><i>Fusarium oxysporum</i> Schltdl.</b>                             | Lithuania, Spain, Ukraine                                                                                                                                | <i>P. radiata</i> , <i>P. pinaster</i> , <i>P. sylvestris</i> , <i>P. nigra</i> , <i>P. halepensis</i> , <i>P. mugo</i> ,                                                                                                                                                                                                                   | 22, 26, 27                                                                                                               |
| <b><i>Fusarium</i> Link</b>                                           | Germany                                                                                                                                                  | <i>P. sylvestris</i>                                                                                                                                                                                                                                                                                                                        | 28                                                                                                                       |
| <b><i>Fusarium verticillioides</i> (Sacc.) Nirenberg</b>              | Spain                                                                                                                                                    | <i>P. sylvestris</i>                                                                                                                                                                                                                                                                                                                        | 29                                                                                                                       |
| <b><i>Heterobasidion annosum</i> (Fr.) Bref.</b>                      | Bulgaria, Finland, France, Germany, Greece, Italy, Ireland, Lithuania, Macedonia, Poland, Portugal, Romania, Russia, Spain, Switzerland, Ukraine, United | <i>Pinus</i> spp., <i>P. pinaster</i> , <i>Chamaecyparis lawsoniana</i> , <i>P. radiata</i> , <i>P. nigra</i> , <i>P. sylvestris</i> , <i>Pseudotsuga menziesii</i> , <i>Picea abies</i> , <i>P. halepensis</i> , <i>P. pinea</i> , <i>Pinus nigra larici</i> , <i>P. cembra</i> , <i>P. peuce</i> , <i>Pinus mugo</i> , <i>P. contorta</i> | 30, 31, 32, 33, 34, 35, 36, 37, 11, 38, 39, 40, 41, 7, 20, 42, 43, 44, 45, 46, 1, 47, 48, 49, 50, 34, 10, 23, 51, 52, 53 |

Table S1: Common pathogens causing root and butt rot on pines in European forest stands

| Pathogen name                                                      | Country of detection               | Host species                              | References    |
|--------------------------------------------------------------------|------------------------------------|-------------------------------------------|---------------|
| Kingdom                                                            |                                    |                                           |               |
| <b><i>Heterobasidion irregulare</i></b><br>Garbelotto & Orosina    | Italy                              | <i>P. pinea</i>                           | 54, 55        |
| <b><i>Heterobasidion parviporum</i></b><br>Niemi & Korhonen        | Italy                              | <i>P. cembra</i>                          | 35            |
| <b><i>Heterobasidion</i> Bref.</b>                                 | Denmark, Poland,<br>Sweden,        | <i>P. sylvestris</i> , <i>P. contorta</i> | 3, 56, 57, 58 |
| <b><i>Onnia triquetra</i> (Pers.)<br/>Imazeki</b>                  | Russia                             | <i>Pinus</i> spp.                         | 59            |
| <b><i>Pestalotia hartigii</i> Tubeuf</b>                           | Ukraine                            | <i>P. sylvestris</i>                      | 60            |
| <b><i>Phaeolus schweinitzii</i> (Fr.)<br/>Pat.</b>                 | Macedonia, Russia                  | <i>Pinus</i> spp., <i>P. peuce</i>        | 51, 23        |
| <b><i>Phellinus pini</i> (Brot.) A. Ames</b>                       | Romania, Russia,<br>Spain, Ukraine | <i>Pinus</i> spp., <i>P. sylvestris</i>   | 4, 23, 61, 15 |
| <b><i>Phellinus hartigii</i> (Allesch. &amp;<br/>Schnabl) Pat.</b> | Russia                             | <i>Pinus</i> spp.                         | 23            |
| <b><i>Phlebiopsis gigantea</i> (Fr.)<br/>Jülich</b>                | Romania                            | <i>P. nigra</i> , <i>P. sylvestris</i>    | 47            |

Table S1: Common pathogens causing root and butt rot on pines in European forest stands

| Pathogen name                                                      | Country of detection | Host species                                                   | References |
|--------------------------------------------------------------------|----------------------|----------------------------------------------------------------|------------|
| <b><i>Pholiota adiposa</i> (Batsch) P. Kumm.</b>                   | Russia               | <i>Pinus</i> spp.                                              | 6          |
| <b><i>Phoma macrostoma</i> Mont.</b>                               | Ukraine              | <i>P. sylvestris</i>                                           | 22         |
| <b><i>Phomopsis</i> (Sacc.) Sacc.</b>                              | Ukraine              | <i>P. sylvestris</i>                                           | 22         |
| <b><i>Phytophthora cactorum</i> (Lebert &amp; Cohn) J. Schröt.</b> | Germany              | <i>P. ponderosa</i> , <i>P. strobus</i> , <i>P. sylvestris</i> | 62, 63     |
| <b><i>Phytophthora cinnamomi</i> Rands</b>                         | Italy                | <i>P. halepensis</i> , <i>P. pinaster</i> <i>P. pinea</i>      | 63         |
| <b><i>Phytophthora cryptogea</i> Pethybr. &amp; Laff.</b>          | Italy                | <i>P. radiata</i>                                              | 64         |
| <b><i>Phytophthora humicola</i> W.H. Ko &amp; Ann</b>              | Italy                | <i>P. pinea</i>                                                | 65         |
| <b><i>Phytophthora plurivora</i> T. Jung &amp; T.I. Burgess</b>    | Germany              | <i>P. sylvestris</i>                                           | 66, 63     |
| <b><i>Porodaedalea pini</i> (Brot.) Murrill</b>                    | Poland               | <i>P. sylvestris</i>                                           | 67         |
| <b><i>Pythium</i> Pringsh.</b>                                     | Ukraine              | <i>P. sylvestris</i>                                           | 60         |

Table S1: Common pathogens causing root and butt rot on pines in European forest stands

| Pathogen name                                            | Country of detection | Host species                  | References |
|----------------------------------------------------------|----------------------|-------------------------------|------------|
| <b><i>Rhizina undulata</i> Fr.</b>                       | Lithuania, Ukraine   | <i>P. mugo, P. sylvestris</i> | 68, 14, 69 |
| <b><i>Rhizoctonia solani</i> J.G. Kühn</b>               | Ukraine              | <i>P. sylvestris</i>          | 60         |
| <b><i>Rhizosphaera kalkhoffii</i><br/>Bubák</b>          | Ukraine              | <i>P. sylvestris</i>          | 60         |
| <b><i>Trichoderma viride</i> Pers.</b>                   | Italy                | <i>P. nigra</i>               | 70         |
| <b><i>Truncatella hartigii</i> (Tubeuf)<br/>Steyaert</b> | Ukraine              | <i>P. sylvestris</i>          | 22         |

Table S1: Common pathogens causing root and butt rot on pines in European forest stands

## References

1. Strouts, R. G.; Winter, T. G., *Diagnosis of ill-health in trees. Second edition*. HMSO: 2000.
2. Greig, B. J. W.; Strouts, R., *Honey fungus*. 1991.
3. Szewczyk, W., Skala zniekształceń systemów korzeniowych sosny zwyczajnej *Pinus sylvestris* (L.) w uprawach leśnych. *Sylwan* **2014**, *158* (10), 754-760.
4. Muñoz López, C.; Pérez Fortea, V.; Cobos Swarez, P.; Hernández Alonso, R.; Sánchez Peña, G., Sanidad Forestal: Guía en imágenes de plagas, enfermedades y otros agentes presentes en los bosques. **2007**.
5. Iturrutxa, E.; Leon, M.; García, I.; Heppe, E.; García-Jiménez, J.; Pérez-Sierra, A., *Distribution and ecology of Armillaria species in northern Spain*. 2007.
6. Storozhenko, V. G.; Krutov, V. I.; Ruokolainen, A. V.; Kotkova, V. M.; Bondartseva, M. A., *Identification Guide for Wood-destroying Fungi of the Russian Plain's Forests*. Second edition ed.; Aquarius, Moscow, Russia: 2016; p 200.
7. Bendel, M.; Kienast, F.; Bugmann, H.; Rigling, D., Incidence and distribution of *Heterobasidion* and *Armillaria* and their influence on canopy gap formation in unmanaged mountain pine forests in the Swiss Alps. *European Journal of Plant Pathology* **2006**, *116* (2), 85.
8. Tsopelas, P., Distribution and ecology of *Armillaria* species in Greece. *European journal of forest pathology* **1999**, *29* (2), 103-116.
9. Tsopelas, P., A comparative study on pathogenicity of *Armillaria* species. In *9th Congress of the Hellenic Phytopathological Society*, Mediterr, P., Ed. Phytopathol. Mediterr: Athens, Greece, 1998; Vol. 40, p 67.
10. Rosnev, B.; Petkov, P., Health status of the Scots pine (*Pinus sylvestris* L.) in representative stands in the Rila mountain. *Forest Science* **1997**, *2*, 66-70.
11. Rosnev, B.; BAS, S. B.; Mirchev, P.; BAS, S. B.; Petkov, P.; BAS, S. B.; Georgiev, G.; BAS, S. B.; Tsankov, G.; BAS, S. B., Changes in the Health Condition of the Scots Pine (*Pinus sylvestris* L.) Plantations in Southwestern Bulgaria during the Period 1986-2005. *Plant Science (Bulgaria)* **2008**.
12. Spaulding, P., Foreign diseases of forest trees of the world. An annotated list. *U.S.D.A. Agric. Handb* **1961**, *197*, 1-361.
13. Bagdžiūnaitė, A., Phytopathological monitoring and protection against fungal diseases in young pine *Pinus sylvestris* L. stands in Lithuania. *Journal of International Scientific Publications: Agricultural & Food* **2013**, *1* (Part 1), 49-56.
14. Kutorga, E.; Adamonytė, G.; Iršėnaitė, R.; Kasparavičius, J.; Markovskaja, S.; Motiejūnaitė, J.; Treigienė, A., A checklist of mycobiota recorded in burnt and unburnt *Pinus mugo* plantations in the Curonian Spit (Lithuania). *Botanica Lithuanica* **2012**, *18* (1), 66-79.
15. Tsilyurik, A. V.; S.V., S., *Forest Pathology. a фїтопатологія*, KVIC: Kiev, 2008; p 268.
16. Guillaumin, J. J.; Mohammed, C.; Anselmi, N.; Courtecuisse, R.; Gregory, S.; Holdenrieder, O.; Intini, M.; Lung, B.; Marxmüller, H.; Morrison, D., Geographical distribution and ecology of the *Armillaria* species in western Europe. *European Journal of Forest Pathology* **1993**, *23* (6-7), 321-341.
17. Labbé, F.; Marcais, B.; Dupouey, J.-L.; Bélouard, T.; Capdevielle, X.; Piou, D.; Robin, C.; Dutech, C., Pre-existing forests as sources of pathogens? The emergence of *Armillaria ostoyae* in a recently planted pine forest. *Forest Ecology and Management* **2015**, *357*, 248-258.
18. Wahlström, K.; Karlsson, J.-O.; Holdenrieder, O.; Stenlid, J., Pectinolytic activity and isozymes in European *Armillaria* species. *Canadian journal of Botany* **1991**, *69* (12), 2732-2739.
19. Szewczyk, W.; Mańka, M., Z badań nad występowaniem opieńkowej zgnilizny korzeni drzew w młodych drzewostanach sosnowych Nadleśnictwa Zielonka [From the investigations on *Armillaria* root rot occurrence in young Scots pine stands in Zielonka Forest District]. *Acta Agrobotanica* **2002**, *55* (1), 319-324.
20. Sierota, Z.; Szczepkowski, A., *Rozpoznawanie chorób infekcyjnych drzew leśnych*. Centrum Informacyjne Lasów Państwowych: 2014.

Table S1: Common pathogens causing root and butt rot on pines in European forest stands

21. Chira, D.; Chira, F., Culture characteristics of the species detached from *Armillaria mellea* complex RSC **2001**, 13-14, 16-21.
22. Davydenko, K.; Vasaitis, R.; Menkis, A., Fungi associated with *Ips acuminatus* (Coleoptera: Curculionidae) in Ukraine with a special emphasis on pathogenicity of ophiostomatoid species. **2017**.
23. Kuz'michev, E. P.; Sokolova, E. S.; Mozolevskaya, E. G., *Diseases of woody plants. Reference book. (Diseases and pests in forests of Russia. Vol. 1)*. VNIILM, Moscow: 2004; p 120.
24. Madar, Z.; Kimchi, M.; Solel, Z., Fusarium canker of Italian cypress. *European journal of forest pathology* **1996**, 26 (2), 107-112.
25. Solel, Z.; Runion, G.; Bruck, R., *Fusarium equiseti* pathogenic to pine. *Transactions of the British Mycological Society* **1988**, 91 (3), 536-537.
26. Lygis, V.; Vasiliauskaite, I.; Matelis, A.; Pliūra, A.; Vasaitis, R., Fungi in living and dead stems and stumps of *Pinus mugo* on coastal dunes of the Baltic Sea. *Plant Protection Science* **2014**, 50 (4), 221-226.
27. Romón, P.; Troya, M.; de Gamarra, M. E. F.; Eguzkitza, A.; Iturrondobeitia, J. C.; Goldarazena, A., Fungal communities associated with pitch canker disease of *Pinus radiata* caused by *Fusarium circinatum* in northern Spain: association with insects and pathogen-saprophyte antagonistic interactions. *Canadian Journal of Plant Pathology-Revue Canadienne De Phytopathologie* **2008**, 30 (2), 241-253.
28. Tokumasu, S.; Aoki, T.; Oberwinkler, F., Fungal succession on pine needles in Germany. *Mycoscience* **1994**, 35 (1), 29-37.
29. Sanz-Ros, A. V.; Müller, M. M.; San Martín, R.; Diez, J. J., Fungal endophytic communities on twigs of fast and slow growing Scots pine (*Pinus sylvestris* L.) in northern Spain. *Fungal biology* **2015**, 119 (10), 870-883.
30. Prieto-Recio, C.; Romeralo, C.; Bezos, D.; Martín-García, J.; Martínez-Álvarez, P.; Botella, L.; Diez, J. J., First Report of *Heterobasidion annosum* on *Pinus pinaster* in Spain. *Plant disease* **2012**, 96 (5), 770-770.
31. Prieto-Recio, C. Biotic, abiotic and management factors involved in *Pinus pinaster* decline in the Iberian Peninsula. 2016.
32. Marçais, B.; Thoirain, B.; Desprez-Lousteau, M.-L.; Piou, D.; Nageleisen, L.-M., Testing the potential and limits of the Level I Network to account for regional and inter-annual variability in damage by pathogens. **2005**.
33. D'Amico, L.; Motta, E.; Annesi, T.; Scire', M.; Luchi, N.; Hantula, J.; Korhonen, K.; Capretti, P., The North American P group of *Heterobasidion annosum* s.l. is widely distributed in *Pinus pinea* forests of the western coast of central Italy. *Forest Pathology* **2007**, 37 (5), 303-320.
34. Scirè, M.; D'Amico, L.; Motta, E.; Annesi, T., North American P type of *Heterobasidion annosum* shows pathogenicity towards *Pinus halepensis* in Italy. *Forest pathology* **2008**, 38 (5), 299-301.
35. Gonthier, P.; Garbelotto, M.; Nicolotti, G., Swiss stone pine trees and spruce stumps represent an important habitat for *Heterobasidion* spp. in subalpine forests. *Forest Pathology* **2003**, 33 (3), 191-203.
36. Sidoti, A.; Lione, G. G.; Guglielmo, F.; Giordano, L.; Pasotti, L.; Gonthier, P., Indagini preliminari su struttura e distribuzione delle popolazioni di *Armillaria mellea* e *Heterobasidion annosum* associate a piante deperienti di *Betula aetnensis* in Sicilia. **2013**.
37. Giordano, L.; Gonthier, P.; Varese, G.; Miserere, L.; Nicolotti, G., Mycobiota inhabiting sapwood of healthy and declining Scots pine (*Pinus sylvestris* L.) trees in the Alps. *Fungal Diversity* **2009**, 38 (69), e83.
38. Peri, T.; Korhonen, K.; Sairanen, A., Occurrence of *Heterobasidion annosum* in pure and mixed spruce stands in southern Finland. *Scandinavian journal of forest research* **1990**, 5 (1-4), 113-125.
39. Heydeck, P.; Knoche, D.; Dahms, C.; Rakel, T.; Bieler, T.; Sauermann, J.; Duhr, M., Prophylaktische Maßnahmen zur Abwehr des Kiefern-Wurzelschwammes (*Heterobasidion annosum*

Table S1: Common pathogens causing root and butt rot on pines in European forest stands

- [Fr.] Bref.) in Erstaufforstungen auf Kippenstandorten im südlichen Brandenburg (Lausitz). *Arch. Forstw. Landsch* **2010**, 44, 107-115.
40. Tsopelas, P.; Korhonen, K., Hosts and distribution of the intersterility groups of *Heterobasidion annosum* in the highlands of Greece. *European Journal of Forest Pathology* **1996**, 26 (1), 4-11.
  41. Tsopelas, P., *Heterobasidion annosum* and *Heterobasidion abietinum* in forests of black pine and fir of Mount Taygetos and Mount Parnon. In *10th Hellenic Phytopathological Congress Mediterr*, P., Ed. Phytopathol. Mediterr: Kalamata, Greece, 2001; Vol. 40, p 188.
  42. Mesanza, N.; Iturrutxa, E., Root and butt rot caused by *Heterobasidion annosum* in Atlantic coniferous ecosystems of Spain. *Forest Pathology* **2012**, 42 (6), 514-520.
  43. Vasiliauskas, A., Distribution of *Heterobasidion annosum* and *Rhizina undulata* in mountain pine (*Pinus mugo*) plantations on Kuronian spit. *Mikologiya i Fitopatologiya* **1999**, 33 (4), 276-279.
  44. Lygis, V.; Vasiliauskas, R.; Stenlid, J.; Vasiliauskas, A., Silvicultural and pathological evaluation of Scots pine afforestations mixed with deciduous trees to reduce the infections by *Heterobasidion annosum* ss. *Forest Ecology and Management* **2004**, 201 (2-3), 275-285.
  45. Lygis, V.; Vasiliauskaite, I.; Stenlid, J.; Vasaitis, R., Impact of forest fire on occurrence of *Heterobasidion annosum* ss root rot and other wood-inhabiting fungi in roots of *Pinus mugo*. *Forestry* **2009**, 83 (1), 83-92.
  46. Lygis, V.; Vasiliauskas, R.; Stenlid, J., Planting *Betula pendula* on pine sites infested by *Heterobasidion annosum*: disease transfer, silvicultural evaluation, and community of wood-inhabiting fungi. *Canadian journal of forest research* **2004**, 34 (1), 120-130.
  47. Chira, D.; Chira, F., Dynamics of wood fungi in wind-fallen stands from Oriental Carpathians. *Analele ICAS* **2001**, 44, 54-59.
  48. Davydenko, K.; Vasaitis, R.; Meshkova, V.; Menkis, A., Fungi associated with the red-haired bark beetle, *Hylurgus ligniperda* (Coleoptera: Curculionidae) in the forest-steppe zone in eastern Ukraine. *European Journal of Entomology* **2014**, 111 (4), 561.
  49. Szewczyk, W., Zagrożenie wybranych drzewostanów sosnowych młodszych klas wieku Nadleśnictwa Drawsko niektórymi czynnikami biotycznymi. *Zarządzanie Ochroną Przyrody w Lasach* **2012**, 6.
  50. Gonthier, P.; Warner, R.; Nicolotti, G.; Mazzaglia, A.; Garbelotto, M. M., Pathogen Introduction as A Collateral Effect of Military Activity. *Mycological research* **2004**, 108, 468-470.
  51. Naceski, S.; Ivanov, B.; Papazov, V.; Papazova, I., Dieback of *Pinus peuce* and *Picea excelsa* in the National Park Pelister. *Plant Protection* **2006**, Vol XVII, 225-235, Skopje.
  52. O'Hanlon, R., The threats posed by pests and pathogens to the forest resource on the island of Ireland. In *2017 Society of Irish Foresters. Annual Sean McBride Forestry Lecture*, 2017.
  53. Neves, N.; Moniz, F.; De Azevedo, N.; Ferreira, d. M.; Ferreira, G., Present phytosanitary situation of Portuguese forests. *EPPO Bulletin* **1986**, 16 (3), 505-508.
  54. Gonthier, P.; Nicolotti, G.; Linzer, R.; Guglielmo, F.; Garbelotto, M., Invasion of European pine stands by a North American forest pathogen and its hybridization with a native interfertile taxon. *Molecular Ecology* **2007**, 16, 1389-1400.
  55. Giordano, L.; Lione, G. G.; Sillo, F.; Gonthier, P. In *Development of practical tools for the monitoring and the control of the invasive plant pathogen Heterobasidion irregulare in central Italy*, XXII Convegno SIPAV, 2016; pp 46-46.
  56. Rönnerberg, J.; Petrylaite, E.; Nilsson, G.; Pratt, J., Two studies to assess the risk to *Pinus sylvestris* from *Heterobasidion* spp. in southern Sweden. *Scandinavian journal of forest research* **2006**, 21 (5), 405-413.
  57. Svensson, S., *Pinus contorta* susceptibility to *Heterobasidion* spp. **2011**.
  58. Læssøe, T.; Petersen, J. H.; Heilmann-Clausen, J.; Søjting, U.; Frøslev, T.; Jeppesen, T. S. Danish Mycological Society - Checklist of Fungi. Version 1.8. <https://doi.org/10.15468/9zvguf> (accessed 2018-03-28).
  59. Fedorov, N. I., *Forest Pathology. Textbook*. Third Edition ed.; Minsk, 2004.



Table S1: Common pathogens causing root and butt rot on pines in European forest stands

60. Davydenko, K.; Meshkova, V., Prevalence of pathogens of needles and shoots in pine seedlings in the Kharkiv region. . *Journal of Kharkiv National Agricultural University (KNAU). Phytopathology and Entomology* **2011**, 9, 57-62.
61. Georgescu, C. C., Dare de seama asupra boalelor de importanta economica semnalate in padurile tarii in anii 1934-1938. *ICES, SII* **1940**, 32.
62. Erwin, D. C.; Ribeiro, O. K., *Phytophthora diseases worldwide*. Department of Plant Pathology, University of California, Riverside, USA. American Phytopathological Society (APS Press) American Phytopathological Society (APS Press), 1996; p 562.
63. Jung, T.; Orlikowski, L.; Henricot, B.; Abad-Campos, P.; Aday, A.; Aguin Casal, O.; Bakonyi, J.; Cacciola, S.; Cech, T.; Chavarriaga, D., Widespread Phytophthora infestations in European nurseries put forest, semi-natural and horticultural ecosystems at high risk of Phytophthora diseases. *Forest Pathology* **2015**.
64. Sechi, C.; Seddaiu, S.; Linaldeddu, B. T.; Franceschini, A.; Scanu, B., Dieback and mortality of *Pinus radiata* trees in Italy associated with *Phytophthora cryptogea*. *Plant disease* **2014**, 98 (1), 159-159.
65. Ginetti, B.; Uccello, A.; Bracalini, M.; Ragazzi, A.; Jung, T.; Moricca, S., Root Rot and Dieback of *Pinus pinea* caused by *Phytophthora humicola* in Tuscany, central Italy. *Plant disease* **2012**, 96 (11), 1694-1694.
66. Jung, T.; Burgess, T., Re-evaluation of *Phytophthora citricola* isolates from multiple woody hosts in Europe and North America reveals a new species, *Phytophthora plurivora* sp. nov. *Persoonia* **2009**, 22, 95.
67. Szewczyk, W.; Wasilewska-Baranowska, M.; Osmólski, R., Ocena stanu zagrożenia drzewostanów sosnowych starszych klas wieku przez Porodaedalea pini w Nadleśnictwie Tuchola. *Zarządzanie Ochroną Przyrody w Lasach* **2014**, 8.
68. Vasiliasukas, A.; Dabkevičius, Z.; Žiogas, A., Miško fitopatologija:[vadovėlis]/Zenonas Dabkevičius, Albertas Vasiliasukas, Algimantas Žiogas;[sudarytojas ir atsakingasis redaktorius Algimantas Žiogas]; Lietuvos Respublikos aplinkos ministerija, Lietuvos žemės ūkio universitetas. **2006**.
69. Davydenko, K. V.; Meshkova, V. L., The study of Rhizina undulata in Ukrainian pine forest stands. In *Forest Science: Proceeding scientific conference to 80-year anniversary URIFFM (12 October, 2010)*, Kharkiv, 2010; pp 170-171.
70. Li Destri Nicosia, M. G.; Mosca, S.; Mercurio, R.; Schena, L., Dieback of *Pinus nigra* Seedlings Caused by a Strain of *Trichoderma viride*. *Plant disease* **2015**, 99 (1), 44-49.
